1 **Title:** Functional cooperativity mediated by rationally selected combinations of human  
2 monoclonal antibodies targeting the henipavirus receptor binding protein

3  
4 **Authors:** Michael P. Doyle<sup>1</sup>, Nurgun Kose<sup>2</sup>, Viktoriya Borisevich<sup>3,4</sup>, Elad Binshtein<sup>2</sup>, Moushimi  
5 Amaya<sup>5</sup>, Marcus Nagel<sup>6</sup>, Edward J. Annand<sup>7,8</sup>, Erica Armstrong<sup>2</sup>, Robin Bombardi<sup>2</sup>, Jinhui  
6 Dong<sup>2</sup>, Kevin L. Schey<sup>6</sup>, Christopher C. Broder<sup>5</sup>, Larry Zeitlin<sup>9</sup>, Erin A. Kuang<sup>9</sup>, Zachary A.  
7 Bornholdt<sup>9</sup>, Brandyn R. West<sup>9</sup>, Thomas W. Geisbert<sup>3,4</sup>, Robert W. Cross<sup>3,4</sup>, James E. Crowe,  
8 Jr.<sup>1,2,10\*</sup>

9  
10 **\*Corresponding author**

11  
12 **Affiliations:**

13 <sup>1</sup>Department of Pathology, Microbiology and Immunology, Vanderbilt University Medical  
14 Center, Nashville, Tennessee, 37232, USA.

15 <sup>2</sup>The Vanderbilt Vaccine Center, Vanderbilt University Medical Center, Nashville, Tennessee,  
16 37232, USA.

17 <sup>3</sup>Department of Microbiology & Immunology, The University of Texas Medical Branch,  
18 Galveston, Texas, 77555, USA.

19 <sup>4</sup>Galveston National Laboratory, University of Texas Medical Branch, Galveston, Texas, 77555,  
20 USA.

21 <sup>5</sup>Department of Microbiology & Immunology, Uniformed Services University of the Health  
22 Sciences, Bethesda, Maryland, 20814

23 <sup>6</sup>Department of Biochemistry, Vanderbilt University, Nashville, Tennessee, 37232, USA.

24 <sup>7</sup>Sydney School of Veterinary Science and Marie Bashir Institute for Infectious Diseases and  
25 Biosecurity, University of Sydney, Sydney, Australia.

26 <sup>8</sup>Black Mountain Laboratories & Australian Centre for Disease Preparedness, Health and  
27 Biosecurity, CSIRO, Canberra & Geelong, Australia.

28 <sup>9</sup>Mapp Biopharmaceutical, Inc., San Diego, California, 92121.

29 <sup>10</sup>Department of Pediatrics, Vanderbilt University Medical Center, Nashville, Tennessee, 37232,  
30 USA.

31

32 **Correspondence:**

33

34 James E. Crowe, Jr., MD

35 **Mail:**

36 Vanderbilt Vaccine Center

37 11475 Medical Research Building IV

38 2213 Garland Avenue

39 Nashville, TN 37232-0417, USA

40 **Telephone** (615)343-8064

41 **Email** [james.crowe@vumc.org](mailto:james.crowe@vumc.org)

42

43 **Abstract**

44 Hendra virus (HeV) and Nipah virus (NiV), the prototypic members of the *Henipavirus* (HNV)  
45 genus, are emerging, zoonotic paramyxoviruses known to cause severe disease across six  
46 mammalian orders, including humans (Eaton et al., 2006). While several research groups have  
47 made strides in developing candidate vaccines and therapeutics against henipaviruses, antivirals  
48 have not been licensed for human use, and significant gaps in knowledge about the human  
49 immune response to these viruses exist. To address these gaps, we isolated a large panel of  
50 human monoclonal antibodies (mAbs) from the B cells of an individual with prior occupation-  
51 related exposure to the equine HeV vaccine (Equivac® HeV). Competition-binding and  
52 hydrogen-deuterium exchange mass spectrometry (HDX-MS) studies identified at least six  
53 distinct antigenic sites on the HeV/NiV receptor binding protein (RBP) that are recognized by  
54 human mAbs. Antibodies recognizing multiple antigenic sites potently neutralized NiV and/or  
55 HeV isolates *in vitro*. The most potent class of cross-reactive antibodies achieved neutralization  
56 by blocking viral attachment to the host cell receptors ephrin-B2 and ephrin-B3. Antibodies from  
57 this class mimic receptor binding by inducing a receptor-bound conformation to the HeV-RBP  
58 protein tetramer, exposing an epitope that appears to lie hidden in the interface between  
59 protomers within the HeV-RBP tetramer. Antibodies that recognize this cryptic epitope potently  
60 neutralized HeV and NiV. Flow cytometric studies using cell-surface-displayed HeV-RBP  
61 protein showed that cross-reactive, neutralizing mAbs from each of these classes cooperate for  
62 binding. In a highly stringent hamster model of NiV<sub>B</sub> infection, antibodies from both classes  
63 reduced morbidity and mortality and achieved synergistic protection in combination and  
64 provided therapeutic benefit when combined into two bispecific platforms. These studies  
65 identified multiple candidate mAbs that might be suitable for use in a cocktail therapeutic

66 approach to achieve synergistic antiviral potency and reduce the risk of virus escape during  
67 treatment.

68

69 **KEYWORDS:** Hendra Virus; Nipah Virus; Henipavirus Infections; Antibodies, Viral; B-  
70 Lymphocytes; Antigen-Antibody Reactions; Antibodies, Monoclonal; Therapy: Epitopes; B-  
71 Lymphocyte.

72 **Introduction**

73 Hendra virus (HeV) and Nipah virus (NiV), the prototypic henipaviruses, are emerging zoonotic  
74 paramyxoviruses known to cause severe disease in humans and diverse other mammalian orders.  
75 Multiple species of of *Pteropid* bats (flying foxes) act as reservoir hosts for these negative-sense,  
76 single-stranded RNA viruses in the *Paramyxoviridae* family with which they are understood to  
77 have co-evolved (Chua et al., 2002; Halpin et al., 2011; Halpin et al., 2000; Vidgen et al., 2015).  
78 HeV is transmitted from flying foxes to horses and from horses to in-contact humans causing  
79 severe respiratory and/or encephalitic disease mediated by endothelial vasculitis in both  
80 (Escaffre et al., 2013; Field, 2016; Murray et al., 1995a). HeV was identified in 1994, having  
81 caused the death of 13 of 20 infected horses and one of two infected humans in Queensland,  
82 Australia (Murray et al., 1995b; Selvey et al., 1995). Spillover has occurred sporadically with  
83 some seasonal and climatic trend since, causing disease in 105 horses and seven humans, with  
84 high case fatality rates. NiV, which was discovered four years after HeV when hundreds of pig  
85 handlers fell ill with encephalitic disease (Chua et al., 1999), has continued to cause sporadic  
86 outbreaks in Bangladesh and India (Arunkumar et al., 2019; Soman Pillai et al., 2020). More  
87 direct routes of infection, including human-to-human transmission, and mortality rates  
88 approaching 100%, have been observed during recent NiV outbreaks (Chadha et al., 2006;  
89 Clayton et al., 2012; Gurley et al., 2007). Anthropogenic and climatic influences on flying foxes  
90 are affecting their roosting, feeding and migration habits as well as their susceptibility to heat-  
91 stress, disease and injury (Kessler et al., 2018; Plowright et al., 2015). These factors together  
92 with their resultant increase in intermediate host contact (humans and domestic animals) are  
93 associated with increasing geographic range and frequency of Henipavirus disease spillover  
94 (Martin et al., 2018; Walsh et al., 2017). While HeV and NiV outbreaks historically have been

95 confined geographically to Australia and Southeast Asia, respectively, risk of pandemic spread  
96 of these highly pathogenic agents related to regional and global population densities and  
97 difficulty avoiding international transmission via infected travelers has been highlighted by  
98 recent experience with SARS-CoV-2 (Morens and Fauci, 2020). Such consideration prompted  
99 the World Health Organization (WHO) to designate henipavirus infections as priority diseases  
100 requiring extensive and immediate research and development (Sweileh, 2017). The risk of global  
101 health crisis associated with Henipaviruses is exacerbated by the lack of licensed antiviral drugs  
102 or vaccines for HNV and a dearth of knowledge of the human immune response to these viruses  
103 (Escaffre et al., 2013; Gomez Roman et al., 2020).

104

105 Passive immune transfer studies in both hamsters and ferrets have provided evidence that  
106 neutralizing antibodies are a correlate of immunoprotection from henipaviruses (Bossart et al.,  
107 2009; Guillaume et al., 2004; Guillaume et al., 2006). These data have been corroborated in  
108 multiple studies by investigators using murine, rabbit, or human antibody discovery technologies  
109 to isolate potentially neutralizing antibodies to HeV and/or NiV (Aguilar et al., 2009; Mire et al.,  
110 2020; Zhu et al., 2006). One of these studies used phage display technology to isolate a human  
111 monoclonal antibody (hmAb), designated m102.4 (Zhu et al., 2008). This mAb potentially  
112 neutralizes both HeV and NiV *in vitro* and protects against infection and disease in experimental  
113 henipavirus challenge models using ferrets or non-human primates (Bossart et al., 2011; Geisbert  
114 et al., 2014; Mire et al., 2016). More recently, two human mAbs, HENV-26 and HENV-32, were  
115 shown to neutralize HeV and NiV by distinct mechanisms and protect from NiV Bangladesh  
116 (NiV<sub>B</sub>) strain challenge in a ferret model (Dong et al., 2020). While these studies have laid a  
117 foundation for our understanding of how to target henipaviruses therapeutically, many questions

118 remain regarding the antigenicity of the attachment glycoprotein, and whether escape mutations  
119 from these mAbs can develop *in vivo*.

120

121 Here, we isolated hmAbs from circulating B cells of an individual with occupation-related  
122 exposure to the equine HeV vaccine (Equivac<sup>®</sup> HeV). Members of this large panel of antibodies  
123 target diverse antigenic sites, many of which are sites of vulnerability for neutralization for at  
124 least one virus. In particular, two functional classes of antibodies that we have termed “receptor-  
125 blocking” or “receptor-enhanced” neutralized HeV and NiV *in vitro* by distinct molecular  
126 mechanisms and provided protection when used as monotherapy against lethal challenge in  
127 hamsters with the highly virulent NiV<sub>B</sub> strain. Antibodies recognizing these sites cooperate for  
128 binding to the henipavirus RBP glycoprotein that mediates attachment (formerly designated the  
129 G or glycosylated attachment protein, but recently renamed by the International Committee on  
130 Taxonomy of Viruses) (Rima et al., 2019). These mAbs also synergize for neutralization of both  
131 VSV-NiV<sub>B</sub>, as well as two Cedar viruses chimerized to display the HeV or NiV<sub>B</sub> RBP and F  
132 surface glycoproteins. Cocktails of antibodies from these groups show superior therapeutic  
133 efficacy in hamsters, while bispecific antibodies bearing antigen binding fragments from both  
134 mAbs also show therapeutic benefit. In this model, “receptor-blocking” mAbs induce  
135 conformational changes to the RBP that better expose the “receptor-enhanced” antigenic site.  
136 These results suggest these mAbs could be used in a cocktail therapeutic approach to achieve  
137 synergistic neutralizing potency against henipavirus infections.

138

139

140 **RESULTS**

141

142 **Cross-reactive, neutralizing antibodies target two distinct antigenic sites on HNV-RBP.**

143 Peripheral blood mononuclear cells (PBMCs) from an Australian veterinarian with occupation-  
144 related exposure to HeV-RBP (Equivac® HeV) were tested for secretion of antibodies binding to  
145 recombinant forms of the NiV attachment (RBP) glycoproteins for NiV<sub>B</sub>, the NiV Malaysian  
146 strain (NiV<sub>M</sub>), or HeV. In total, we isolated 41 distinct new mAbs that bind henipavirus RBPs. In  
147 order to group this large panel of mAbs rationally into those that recognized similar antigenic  
148 sites, we used a surface plasmon resonance platform to bin antibodies based on the antigenic  
149 sites they recognized on recombinant protein comprising the HeV-RBP head domain. This  
150 method immobilizes a first antibody on the surface of a gold-coated sensor-chip that captures  
151 soluble antigen, and then assesses the ability of a second antibody to bind to the captured  
152 antigen. The resulting data showed that mAbs binding to HeV-RBP recognized at least 6 distinct  
153 major antigenic sites, designated A-F (**Figure 1A, S1**).

154

155 In tandem, we used hydrogen-deuterium exchange mass spectrometry (HDX-MS) to map the  
156 antigenic sites of representative antibodies from each group (**Figure 1B**), along with binding and  
157 neutralization assays to determine cross-reactivity and functional activity (**Figure 1C, D**).

158 Antibodies belonging to groups A and C cross-reacted with HeV, NiV<sub>M</sub>, and NiV<sub>B</sub>-RBP, and  
159 neutralized the corresponding viral strains. Group A, specifically, includes the control mAb  
160 m102.4, which has been thoroughly characterized for its ability to viral attachment to the host  
161 cell receptors ephrin-B2 and ephrin-B3, and potently neutralize both HeV and NiV. As expected,  
162 a representative group A mAb HENV-98 caused a decrease in deuterium exchange in a region of



163 the HeV-RBP that corresponds to the receptor-binding site. All group A mAbs also neutralized  
164 HeV, NiV<sub>M</sub>, and NiV<sub>B</sub> strains *in vitro*. Notably, HENV-117 displayed exceptional potency, with  
165 half maximal inhibitory concentration (IC<sub>50</sub>) values of 14, 8, or 15 ng/mL against HeV, NiV<sub>M</sub>, or  
166 NiV<sub>B</sub>, respectively. To date, this is the most broad and potent neutralizing mAb targeting HeV  
167 and NiV ever described, suggesting it may possess superior therapeutic activity.

168

169 Group D represents a second class of mAbs that cross-neutralize HeV NiV<sub>M</sub>, and NiV<sub>B</sub>, albeit  
170 with roughly 10-fold less potency than group A. The group D representative mAb HENV-107  
171 mapped to a distinct site on the HeV-RPB head domain spanning the β1 and β6 propeller blades.  
172 This region of the head domain likely lies at the interface between protomers within the dimer-  
173 of-dimers structure of the HeV-RBP tetramer, suggesting a semi-cryptic site of vulnerability on  
174 RBP (Lee and Ataman, 2011). This region has been postulated to be important in fusion  
175 triggering, as point mutations made to this region render F unable to complete its fusion cascade  
176 (Aguilar et al., 2009; Liu et al., 2013).

177

178 While mAbs in group C display limited cross-neutralization of HeV and NiV, groups B and E  
179 contain mAbs that only neutralize HeV with appreciable potency. Group F mAbs are weakly  
180 neutralizing or non-neutralizing and appear to target an antigenic site that lies on the RBP face  
181 opposite the receptor-binding domain. This epitope is likely in a site that is poorly accessible in  
182 the membrane-bound form of RBP, lending to the poor neutralizing activity observed for these  
183 mAbs. Overall, we discovered and mapped cross-reactive, neutralizing mAbs targeting two  
184 distinct major antigenic sites that likely use distinct mechanisms to achieve virus neutralization.

185

186 **Neutralizing mAbs either compete with, or are enhanced by, ephrin-B2 binding to HeV-**  
187 **RBP.** With the knowledge that group A mAbs map to the receptor-binding domain of HeV-RBP,  
188 we sought to determine if these antibodies could block binding of soluble ephrin-B2 to cell  
189 surface-displayed HeV-RBP. 293F cells were transiently transfected with a cDNA construct  
190 encoding full-length HeV-RBP (head, stalk, transmembrane, and cytoplasmic domains) and  
191 incubated for 72 hours. These cells then were incubated with saturating concentrations of  
192 recombinant, soluble ephrin-B2, followed by addition of anti-RBP mAbs at a concentration of 2  
193  $\mu\text{g}/\text{mL}$  to assess the ability of antibodies to bind RBP in its receptor-bound state. Cells were  
194 analyzed by flow cytometry, comparing antibody binding in the presence or absence of ephrin-  
195 B2 (**Figure 2A**). Antibodies in group A displayed a substantial decrease in binding in the  
196 presence of ephrin-B2, supporting the hypothesis that mAbs from this group potentially neutralize  
197 by blocking binding of virus to host cells. This receptor-blocking phenotype is reflected in the  
198 activity of the control mAb m102.4, which also displayed decreased signal when associated to  
199 receptor-bound RBP.

200

201 We also assessed antibodies from all other epitope binning groups for their ability to bind RBP in  
202 the presence of ephrin-B2. Antibodies from group F did not bind to surface-displayed HeV-RBP,  
203 further suggesting these antibodies cannot access this antigenic site when RBP is in its  
204 tetrameric, membrane-bound form. Group B, C, and E mAbs bound to HeV-RBP with equal  
205 signal in the presence or absence of ephrin-B2. Surprisingly, cross-reactive and neutralizing  
206 antibodies in group E displayed a “receptor-enhanced” phenotype, in which binding was  
207 increased in the presence of ephrin-B2. As HDX experiments suggested this antigenic site lies at  
208 the putative interface between protomers within the HeV-RBP dimer, it is likely that receptor

209 binding alters the conformation of HeV-RBP, better exposing this epitope and increasing binding  
210 by mAbs to this site. In summary, cross-reactive and neutralizing mAbs displayed either  
211 “receptor-blocking” or “receptor-enhanced” phenotypes, suggesting distinct neutralization  
212 mechanisms used by antibodies targeting distinct sites.

213

214 **Negative stain electron microscopy (nsEM) elucidates structural determinants of**  
215 **recognition by receptor-blocking and receptor-enhanced mAbs.** To gain insight into the  
216 structural determinants of recognition by “receptor-blocking” and “receptor-enhanced” mAbs,  
217 we performed nsEM on HeV-RBP complexed with representative Fabs based on the sequence of  
218 HENV-117 (blocking) or HENV-103 (enhanced). Initial studies with HeV-RBP ectodomain  
219 (head and stalk domains) purified by size exclusion chromatography showed substantial  
220 structural heterogeneity of both dimeric and tetrameric complexes (data not shown). In order to  
221 generate more structurally homogeneous antigen suitable for 3D reconstruction, we purified  
222 HeV-RBP by gradient fixation ultracentrifugation using a 10 to 30% glycerol gradient containing  
223 a linear 0 to 0.1% glutaraldehyde gradient. This method achieved highly pure material,  
224 appropriate separation of monomeric, dimeric, and tetrameric species, and structural  
225 homogeneity induced by mild glutaraldehyde fixation. Dimeric HeV-RBP was complexed with a  
226 molar excess of HENV-117 and HENV-103 and assessed using nsEM.

227

228 Both HENV-103 and HENV-117 bind simultaneously to the HeV-RBP, further confirming these  
229 mAbs recognize distinct antigenic sites (**Figure 2B**). By docking the crystal model of the head  
230 domain bound the ephrin-B2 receptor to the EM map, we observed that HENV-117 mimics the  
231 binding position of the receptor, confirming the ability of 117 to block receptor attachment

232 **(Figure S3A)**. Conversely, HENV-103 approaches the HeV-RBP perpendicular to the receptor  
233 binding domain at the putative interface between protomers within the RBP tetramer **(Figure**  
234 **S3B)**. This antigenic site overlaps with previous published mAbs, including HENV-32.  
235 Furthermore, modeling suggests that HENV-117 uses a long CDRH3 loop, binding to RBP in a  
236 manner similar to the GH loop of ephrin-B2. In summary, HENV-103 and HENV-117 map to  
237 distinct antigenic sites by negative stain EM, with HENV-117 mimicking ephrin-B2 binding,  
238 while HENV-103 binds at the putative dimeric interface.

239

240 **Antibodies provide therapeutic protection in a highly stringent model of Nipah Bangladesh**  
241 **virus challenge in Syrian golden hamsters.** Previous studies of murine and human mAbs  
242 targeting HeV and/or NiV suggested passive immunization as a potential strategy for therapeutic  
243 intervention. To assess therapeutic activity of antibodies in this large panel, we chose 5 candidate  
244 mAbs representing groups A (receptor-blocking HENV-98, HENV-100, HENV-117) and D  
245 (receptor-enhanced HENV-58, HENV-103) to test in a highly stringent NiV<sub>B</sub> challenge model in  
246 hamsters (Wong et al., 2003). Disease in this model follows a two-stage disease pattern with  
247 differing sequelae: an acute respiratory distress syndrome (ARDS)-like respiratory tract  
248 component starting at day 3 to 4, and an encephalitic component beginning at days 8 to 12. On  
249 day 0, Syrian golden hamsters were challenged intranasally with  $5 \times 10^6$  PFU NiV<sub>B</sub>. The  
250 following day, hamsters were administered a 10 mg/kg dose of antibody by the IP route and  
251 monitored for 28 days after challenge. While the hamster administered a vehicle control solution  
252 succumbed at day 3, as much as 60% survival was achieved in animals administered either  
253 “receptor-blocking” or “receptor-enhanced” mAbs. **(Figure 3A)**. The two most protective mAbs  
254 from each class were HENV-117 and HENV-103, for which surviving animals in each treatment

255 group were able to maintain body weight throughout the study (**Figure 3B**). HENV-117 and  
256 HENV-103 were also the two most potent mAbs from groups A and D, suggesting *in vitro*  
257 potency by antibodies targeting these sites correlates with *in vivo* efficacy. In summary, receptor-  
258 blocking and receptor-enhanced mAbs protect hamsters from NiV<sub>B</sub> challenge, with HENV-117  
259 and HENV-103 representing the most promising candidates targeting two distinct antigenic sites.

260

261 **HENV-117 and HENV-103 cooperate for binding to HNV-RBP, synergistically neutralize**  
262 **rCedV-HeV.** RNA viruses, including HeV and NiV, use error-prone RNA-dependent RNA  
263 polymerase (RdRP) complexes to achieve genome replication (Welch et al., 2020). While  
264 generation of errors can lead to non-viable genomes in some cases, this process also affords  
265 viruses the ability to escape from small and large molecule therapies by introducing amino acid  
266 substitutions in the sites recognized by these molecules (Borisevich et al., 2016). This escape  
267 pattern is of concern and has been observed in both *in vitro* and *in vivo* studies of diverse RNA  
268 viruses, showing that antibody monotherapy approaches against viral pathogens may be  
269 susceptible to failure. In order to combat escape, cocktails of antibodies targeting the same or  
270 differing antigenic sites offer a higher threshold of protection, with escape becoming statistically  
271 highly unlikely. Concurrently, studies of antibody cocktails against Ebola virus, HIV, and more  
272 recently SARS-CoV-2, show the potential for synergistic activity by neutralizing antibodies, in  
273 which one antibody potentiates the activity of another (Howell et al., 2017; Miglietta et al., 2014;  
274 Zost et al., 2020a). With this goal in mind, we sought to determine whether “receptor-blocking”  
275 and “receptor-enhanced” mAbs cooperatively bind to and neutralize henipaviruses. We  
276 hypothesized that “receptor-blocking” mAbs would mimic the structural rearrangements in HeV-  
277 RBP by ephrin-B2, better exposing the “receptor-enhanced” epitope, allowing for synergistic

278 neutralization by combinations of these antibodies. We chose the most potent and protective  
279 candidates from each class, HENV-103 and HENV-117, for these studies.

280

281 We first tested the ability of HENV-117 to enhance the binding of HENV-103 to cell-surface  
282 displayed RBP. Using the surface-display system, we incubated HeV-RBP-transfected cells in  
283 saturating concentrations of mAbs that block ephrin-B2 binding. Without washing, we then  
284 added serial dilutions of HENV-103 chemically labeled with an Alexa Fluor-647 tag. Cells then  
285 were analyzed by flow cytometry to determine if HENV-103 showed increased binding signal  
286 across a dilution series in the presence of “receptor-blocking” mAbs. When cells were incubated  
287 with HENV-103 only, half maximal binding was achieved at 5,289 ng/mL. When cells were first  
288 incubated with saturating concentrations of HENV-117, the EC<sub>50</sub> of HENV-103 shifted to 350  
289 ng/mL, representing an increase in binding activity of approximately 15-fold (**Figure 4A**).

290 Notably, this cooperativity is unidirectional, as HENV-103 did not increase the binding of  
291 HENV-117 (**Figure 4A**). This cooperative phenotype also depends on HENV-117, with  
292 increasing HENV-117 concentrations showing increased binding by a constant concentration of  
293 HENV-103 (**Figure 4B**). These data suggest that antibodies that bind the ephrin-B2 binding site  
294 on HeV-RBP, such as HENV-117, mimic the conformational changes induced by ephrin-B2  
295 binding, making a semi-cryptic epitope recognized by HENV-103 more accessible.

296

297 In order to show that this cooperative binding phenotype is recapitulated functionally, we  
298 performed neutralization tests using solutions containing antibody pairs to determine synergistic  
299 neutralization potential. In order to perform these assays in BSL-2 facilities, we used a non-  
300 pathogenic henipavirus chimerized with HeV or NiV<sub>B</sub> glycoproteins. In this system, recombinant

301 Cedar virus (rCedV) was engineered genetically to express RPB and F from HeV or NiV<sub>B</sub>, as  
302 well as a GFP reporter. The resulting chimeric viruses rescued were termed rCedV-NiV<sub>B</sub> or  
303 rCedV-HeV. We used a matrix approach to test antibody pairs for neutralization synergy, in  
304 which serial dilutions of HENV-117 and HENV-103 were mixed together in a pairwise matrix,  
305 followed by incubation with rCedV-HeV. Virus/mAb mixtures then were added to Vero E6 cell  
306 monolayer cultures in 96-well plates. At approximately 22 hours after inoculating cells with  
307 virus/antibody mixtures, plates were fixed and GFP+ foci counted to enumerate neutralization  
308 values. To calculate synergy, neutralization matrix data were uploaded to the open source  
309 program “SynergyFinder,” and synergy scores were calculated using the zero interactions  
310 potency (ZIP) model (Ianevski et al., 2020). A score >10 suggests synergistic activity. We  
311 observed that HENV-103 and HENV-117 gave an overall ZIP score of 13.1, with select  
312 physiologically achievable cocktail concentrations achieving synergy scores >20 (**Figure 4C**).  
313 This synergy was also observed when using rCedV-NiV<sub>B</sub>, as well as a VSV pseudotyped with  
314 NiV<sub>B</sub> RBP and F, a platform described in detail previously (**Figure S4A,B**) (Mire et al., 2019).  
315 These data together with binding studies show that antibodies from these classes cooperate for  
316 binding to RBP and synergistically neutralize chimeric and pseudotyped viruses bearing RBP  
317 and F proteins from HeV or NiV<sub>B</sub>, suggesting they will likely function to synergistically  
318 neutralize pathogenic henipaviruses.

319

320 **Antibody cocktails and derivative bispecific mAbs provide improved therapeutic activity in**  
321 **hamsters.** Synergy observed *in vitro* by HENV-103 and HENV-117 against VSV-NiV<sub>B</sub> and  
322 rCedV-NiV<sub>B</sub> suggested the potential for *in vivo* synergistic protection from NiV<sub>B</sub> infection. To  
323 assess this possibility, we took two separate approaches. In the first approach, we tested HENV-

324 103 and HENV-117 as a cocktail therapy in Syrian golden hamsters. Previously, animals were  
325 treated with 10 mg/kg for each individual mAb. In this study, animals were treated with 5 mg/kg  
326 HENV-103 and 5 mg/kg HENV-117 at 24 hours after intranasal inoculation with NiV<sub>B</sub>. Using  
327 monotherapy, we found that 3 of 5 animals treated with either HENV-103 or HENV-117  
328 survived throughout the study. However, when given in combination, all animals survived and  
329 maintained/gained weight for 28 days after infection (**Figure 5B**). These data show that HENV-  
330 103 and HENV-117 provide synergistic protection in hamsters when administered together 24  
331 hours after infection with NiV<sub>B</sub>.

332  
333 The second approach used two bispecific antibody platforms. The dual variable domain (DVD)  
334 construct bears two heavy and light chain variable domains in each “arm,” with the domains  
335 most Fc-distal corresponding to HENV-117 (Wu et al., 2007). A similar construct, termed  
336 Bis4Ab, differs from DVD in that the Fc-distal HENV-117 component contains a full Fab  
337 fragment, whereas the HENV-103 contains only heavy and light chain variable domains in a Fc-  
338 proximal scFv format (Dimasi et al., 2019; Thanabalasuriar et al., 2017). We first tested these  
339 constructs *in vitro* against VSV-NiV<sub>B</sub> and found that both DVD and Bis4Ab constructs strongly  
340 neutralized VSV-NiV<sub>B</sub> with similar potency (**Figure 5A**). We again tested these in the Syrian  
341 golden hamster model of NiV<sub>B</sub> infection and found that in the DVD group, 4/5 hamster survived,  
342 while protection in the Bis4Ab group mirrored that of monotherapy, with 3/5 hamsters surviving.  
343 These data suggest that there may be added complexity to using bispecific antibody platforms  
344 (whether or not both antigen binding fragments can engage antigen simultaneously, serum half-  
345 life in rodents, etc.) and that combined administration of HENV-103 and HENV-117 provides



346 superior *in vivo* protection in comparison to monotherapy. This feature is complemented by the  
347 added benefit of further protection from escape mutation.

348

## 349 **Discussion**

350 Recent epidemics or pandemics of Ebola, 2009 H1N1 influenza, and SARS-CoV-2 viruses  
351 highlight the need for development of countermeasures against emerging viruses prior to  
352 pandemics beginning. HeV and NiV are emerging and highly pathogenic viruses with confirmed  
353 human-to-human transmission for which licensed treatments or vaccines for human use do not  
354 exist. In this study, we isolated a panel of mAbs specific for the henipavirus RBP glycoprotein  
355 from an individual with prior occupation-related exposure to equine HeV-RBP subunit vaccine.  
356 Competition-binding and HDX-MS studies identified at least six distinct antigenic sites  
357 recognized by these mAbs. Flow cytometric studies with surface-displayed HeV-RBP showed  
358 that potently neutralizing, cross-reactive antibodies either a) blocked HeV-RBP binding to  
359 ephrin-B2, or b) showed enhanced binding in the presence of ephrin-B2. Antibodies that block  
360 receptor binding also induced the “receptor-enhanced” phenotype, showing that antibodies to  
361 these two classes cooperate for binding to HNV-RBP. Concurrently, these mAbs also showed  
362 synergy in neutralization of rCedV-HeV particles. As monotherapy, “receptor-blocking” and  
363 “receptor-enhanced” antibodies provided modest protection in a highly lethal NiV<sub>B</sub> challenge  
364 model in Syrian golden hamsters. In combination, these antibodies provided complete  
365 therapeutic protection in the same model of infection.

366

367 A significant concern when using antibodies as therapeutics against emerging infectious diseases  
368 due to RNA viruses is the potential for viral ‘mutational escape’ within an infected host and

369 immune evasion by divergent variants. Escape from antibody-mediated neutralization has been  
370 documented even with ultrapotent mAbs targeting conserved epitopes on viral glycoproteins  
371 (Greaney et al., 2020). Using a cocktail of mAbs provides resistance against escape, with the  
372 potential added benefit of synergistic antiviral potency, allowing for lower dosing. The potential  
373 for spillover of divergent variants of bat-borne Paramyxoviruses (Henipaviruses and  
374 Rubulaviruses) is consistent with the inherent propensity of RNA viruses for rapid evolution.  
375 Furthermore, flying foxes serve as ideal reservoir hosts because of their dense community  
376 roosting patterns and relative resistance to paramyxoviral disease (Baker et al., 2012; Barr et al.,  
377 2015; Drexler et al., 2012; Luis et al., 2015; Peel et al., 2019; Sasaki et al., 2012; Vidgen et al.,  
378 2015). The discovery of protective antibodies highlighted here, specifically HENV-103 and  
379 HENV-117, offer the opportunity to construct a cocktail of antibodies with most-desired  
380 protective properties including against mutation escape and spillover variant viruses.  
381 Concurrently, a bispecific antibody with activity of both HENV-103 and HENV-117 is an  
382 attractive therapeutic option that endows a single therapeutic molecule with the synergistic  
383 potency of two individual mAbs. While we showed that two antibodies targeting RBP offer a  
384 synergistic benefit, the possibility exists that having antibodies targeting both RBP and F may  
385 provide also be of benefit. Recently, highly potent and protective anti-F antibodies have been  
386 described and may offer an ideal partner to HENV-103, HENV-117, or both as a triple antibody  
387 cocktail (Dang et al., 2019; Mire et al., 2020).

388

389 As with other paramyxoviruses, humans likely elicit highly functional antibodies against the  
390 henipavirus F glycoprotein (Merz et al., 1980). This concept is highlighted by palivizumab, an  
391 anti-F antibody used as a prophylaxis for premature infants to protect from infection by

392 respiratory syncytial virus (Meissner et al., 1999). Although, as highlighted above, protective  
393 anti-F mAbs have been isolated, these have been uniformly of murine origin. The full antigenic  
394 landscape of the henipavirus F protein may suggest new sites of vulnerability to neutralization by  
395 monoclonal antibodies and could guide the rational design of henipavirus vaccines. This  
396 opportunity is especially important considering the geographical range of henipaviruses, and the  
397 fact that a previously undescribed virus from this genus may emerge to cause a pandemic.  
398 Having knowledge of the determinants of neutralization for both RBP and F will allow for quick  
399 mobilization of platform technologies to develop vaccines, similar to what we have seen in the  
400 response to the SARS-CoV-2 pandemic (Zost et al., 2020b).

401

402 The Syrian golden hamster model of henipavirus infection is a well-characterized model suitable  
403 for down-selection of therapeutic antibody candidates. With wild-type mice being completely  
404 refractory to infection, the hamster is currently the most cost-effective small animal model  
405 available. With these benefits in mind, there are also limitations to these studies. The biphasic  
406 nature of NiV<sub>B</sub> disease in hamsters, for instance, in which respiratory disease precedes  
407 neurological sequelae, does not fully recapitulate the human condition. Ferrets, and optimally,  
408 African Green monkeys, are potential models for further preclinical development of these  
409 promising antibody candidates. This possibility is especially true of the AGM model of NiV<sub>B</sub>  
410 infection, in which the therapeutic window for use of antibody therapies (treatment at days 3 to  
411 5) is shorter than that of HeV and NiV<sub>M</sub> (treatment at days 5 to 7) (Mire et al., 2016). Studies in  
412 these models might further elucidate if HENV-103 and HENV-117 are superior to previously  
413 described antibodies.

414

415 Here, and in previous studies, functional anti-henipavirus RBP-specific mAbs from multiple  
416 species have been isolated. These antibodies uniformly recognize the head domain of RBP,  
417 suggesting this region is likely the most immunogenic domain of the RBP. Multiple studies  
418 interrogating the function of RBP, and its role in triggering the F protein to undergo significant  
419 conformational rearrangements, have pointed to the RBP stalk domain as playing a significant  
420 role in viral fusogenicity. Specifically, Aguilar *et al.* have shown that the C-terminal portion of  
421 the stalk domain can trigger fusion of membranes in the absence of a head domain (Liu et al.,  
422 2013). While it is likely that the stalk domain, which is partially obstructed by the head domain,  
423 is immunogenically subdominant, it is possible that rare, circulating memory B cells harboring  
424 antibodies targeting this domain exist. Future studies interrogating the antibody response to these  
425 viruses also may shed light on the role of mAbs targeting the stalk domain of HNV-RBP, and  
426 whether these antibodies have the potential to prevent viral and host membrane fusion.  
427

428 **SUPPLEMENTAL INFORMATION**

429 Supplemental Information including supplemental experimental procedures, figures, and tables  
430 can be found with this article online.

431

432 **ACKNOWLEDGEMENTS**

433 We thank Chris Gainza and Rachel Nargi from Vanderbilt in the Crowe laboratory for technical  
434 support with antibody production and purification, and Joseph Reidy, Andrew Trivette, and  
435 Robert Carnahan for intellectual contributions to antibody production and sequencing, and Ian  
436 Setliff and Ivelin Georgiev for statistical support. We also thank Mathew Hyde and the UTMB  
437 Animal Resource Center for their assistance with animal procedures. This work was supported  
438 by a grant from the National Institutes of Health (NIH) U19 AI142764 and departmental funds  
439 from UTMB to Thomas Geisbert. The work of MPD was supported by NIH fellowship grant F31  
440 AI152332. The project described was supported by CTSA award No. UL1 TR002243 from the  
441 National Center for Advancing Translational Sciences (NCATS). The contents of this  
442 publication are solely the responsibility of the authors and do not necessarily represent the  
443 official views of NIAID or NIH.

444

445 **AUTHOR CONTRIBUTIONS**

446 Conceptualization M.P.D. and J.E.C.; Methodology M.P.D., N.K., V.B., I.S., I.G., K.L.S.,  
447 E.A.K., B.R.W.; Investigation M.P.D., N.K., V.B., E.B., M.A., M.N., E.A., R.B., J.D., I.S.,  
448 K.L.S., L.Z., E.A.K., Z.A.B., B.R.W., T.W.G., R.W.C., J.E.C.; Resources E.J.A., C.C.B.,  
449 T.W.G., J.E.C.; Writing – Original Draft M.P.D., J.E.C., Writing – Review & Editing all authors;

450 Supervision C.C.B., T.W.G., J.E.C.; Project Administration T.W.G., J.E.C.; Funding Acquisition  
451 M.P.D., L.Z., T.W.G., J.E.C.

452

453 **Declaration of interests.** J.E.C. has served as a consultant for Lilly and Luna Biologics, is a  
454 member of the Scientific Advisory Boards of CompuVax and Meissa Vaccines and is Founder of  
455 IDBiologics. The Crowe laboratory at Vanderbilt University Medical Center has received  
456 unrelated sponsored research agreements from IDBiologics and AstraZeneca. E.A.K., Z.A.B.,  
457 and B.R.W. are employees and shareholders of Mapp. L.Z. is an employee, shareholder and co-  
458 owner of Mapp. All other authors declare no competing interests.

459 **Figure Legends**

460

461 **Figure 1. Identification of major antigenic sites for recognition of RBP by human mAbs. A)**

462 Surface plasmon resonance competition-binding of human antibodies against HeV-RBP. A first

463 antibody was applied to a gold-coated sensorchip, and recombinant HeV-RBP head domain was

464 associated to the coupled antibody. A second antibody was applied to the sensorchip to

465 determine binding to RBP. Black boxes indicated a pairwise interaction in which the binding of

466 the second antibody is blocked by the first. White indicates both antibodies could bind

467 simultaneously. Gray indicates an intermediate competition phenotype. The matrix was

468 assembled using the Carterra Epitope software. **B)** Hydrogen-deuterium exchange mass

469 spectrometry profiles for representative mAbs. Decrease (blue) or increase (red) in deuterium

470 exchange on HeV-RBP in the presence of antibody is mapped onto the crystal structure of HeV-

471 RBP (PDB 6CMG). Structures are positioned in 3 orientations, with the top structure noting the

472 ephrin-B2 binding site in yellow. **C)** Half maximal binding (blue) or neutralization (green)

473 concentrations for antibodies against recombinant proteins or live HeV or NiV, respectively. **D)**

474 Neutralization curve plots for representative antibodies against HeV, NiV Malaysia, or NiV

475 Bangladesh viruses. Representative  $EC_{50}$  values for binding from 3 independent experiments are

476 shown.  $IC_{50}$  values for neutralization are from a single independent experiment due to limitations

477 of BSL-4 resources.

478

479 **Figure 2. Receptor blocking and structural studies. A)** Antibody binding to cell-surface-

480 displayed HeV-RBP when ephrin-B2 is bound. Cells transiently transfected with a cDNA

481 encoding the full-length HeV-RBP were incubated with a saturating concentration of

482 recombinantly expressed ephrin-B2. Without washing, cells were incubated with 2  $\mu\text{g/mL}$   
483 antibody, and binding was compared to binding of antibodies in the absence of ephrin-B2. The  
484 mAb m102.4 served as a control for receptor competition. Pooled data from 3 independent  
485 experiments are shown. **B)** Three-dimensional reconstruction from negative stain electron  
486 microscopy of dimeric HeV-RBP full ectodomain bound to HENV-103 Fab and HENV-117-Fab.  
487 The EM map is shown in gray, the Fabs are in purple and green, and the RBP head domain is  
488 colored by  $\beta$ -propeller. 2D classes are shown, with box size of 128 at A/pix of 3.5.

489

490 **Figure 3. Therapeutic protection by human antibodies in hamster model of Nipah**

491 **Bangladesh challenge.** Survival curves (left) and weight maintenance (right) for hamsters  
492 treated with 10 mg/kg antibody (n=5 per group) 24 hours post-inoculation with  $5 \times 10^6$  PFU NiV  
493 Bangladesh by the intranasal route. An untreated control animal (n=1) succumbed to infection 3  
494 days post-inoculation. All weight maintenance charts include control animal in black. Two  
495 historical controls are plotted on survival curves and pooled with the experimental control to  
496 perform statistical analysis by the long rank Mantel-Cox test.

497

498 **Figure 4. Synergistic binding and neutralization. A)** Cooperative binding by HENV-103 and  
499 HENV-117 to cell-surface-displayed HeV-RBP. Cells expressing HeV-RBP were incubated with  
500 unlabeled HENV-103 or HENV-117, followed by addition of a dilution series of Alexa Fluor  
501 647 (AF647) -labeled HENV-103 or HENV-117. Cells were analyzed by flow cytometry and  
502 gated for AF647-positive cells. Data were pooled from 3 independent experiments. **B)**  
503 Dependence of HENV-117 effective concentration on HENV-103 binding enhancement. Cells  
504 were incubated with varying concentrations of unlabeled HENV-117, followed by incubation



505 with AF647-labeled HENV-103 at 0.5  $\mu\text{g/mL}$ , with enhancement calculated by comparing  
506 AF647+ cells to HENV-103 binding to HeV-RBP in the absence of HENV-117. Representative  
507 data from 3 independent experiments are shown. **C)** Synergistic neutralization of rCedV-HeV by  
508 HENV-103 and HENV-117 combinations. Neutralization values at each matrix concentration  
509 (top) and calculated synergy scores (bottom) are shown. Serial dilutions of HENV-103 and  
510 HENV-117 were mixed with 4,000 PFU rCedV-HeV-GFP for 2 hours, followed by addition to  
511 Vero E6 cell monolayers in 96 well plates. Formalin fixed cells were imaged using a CTL S6  
512 analyzer to count GFP+ cells. Neutralization was calculated by comparing treatment to virus-  
513 only control wells. Values were imported into SynergyFinder using a Zero Interactions Potency  
514 (ZIP) statistical model. Delta scores  $>10$  indicate likely synergy. Two independent experiments  
515 were performed, with data from a single representative experiment shown.

516

517 **Figure 5. Antibody cocktail and corresponding bispecific antibody therapeutic activity in**  
518 **hamsters. A)** Neutralization of VSV-NiV<sub>B</sub> by bispecific antibodies in comparison to equimolar  
519 antibody cocktail. Representative data from two independent experiments is shown, each  
520 performed in technical triplicate. **B)** Syrian golden hamster challenge studies with HENV-103  
521 and HENV-117 cocktail or corresponding bispecific antibodies. Challenge studies were  
522 performed as described above. P values represent statistical significance as determined by  
523 Mantel-Cox log rank test. N=5 animals were included in all groups, with control animals treated  
524 with PBS at 24 hours post-inoculation.

525

526 **Figure S1 (related to figure 1). ELISA binding curves for representative antibodies from**  
527 **group A (receptor-blocking), group D (receptor-enhanced), or control antibodies. Values**

528 were fit to a non-linear regression model in GraphPad to generate curves following log  
529 transformation of antibody concentrations. Data representative of three independent experiments  
530 performed in technical duplicate are shown.

531

532 **Table S1 (related to Figure 1). Sequence features of 5 potently neutralizing, cross reactive**  
533 **antibodies chosen for *in vivo* studies.** Heavy and light chain sequences were analyzed using  
534 IgBLAST to identify V(D)J pairings for each mAb shown.

535

536 **Figure S2 (related to Figure 1). Pearson correlation analysis of surface plasmon resonance**  
537 **competition binding.**

538

539 **Figure S3 (related to Figure 2). Prediction of antigenic sites recognized by HENV-103 and**  
540 **HENV-117 by negative stain EM. A)** The RBP head domain with a model of HENV-117 scFv  
541 (gray) overlapping with ephrin-B2 receptor electron density (dot surface PRB: 9PDL). **B)** The  
542 RBP head domain with a model of HENV-103 Fv (blue) from top (right, looking down on  
543 ephrin-B2 binding face) and side (left) view. Black line denoted the putative dimerisation  
544 interface

545

546 **Figure S4 (related to Figure 3). Synergistic neutralization of rCedV-NiV<sub>B</sub> and VSV-NiV<sub>B</sub>**  
547 **by HENV-103 and HENV-117.** Synergy plots using the zero interactions potency (ZIP) model  
548 generated by SynergyFinder for neutralization of **A)** rCedV-NiV<sub>B</sub> or **B)** VSV-NiV<sub>B</sub>.

549 Representative data from two (A) or three (B) independent experiments shown.

550

551

## 552 **Methods**

### 553 **Generation of hmAbs**

554 Peripheral blood mononuclear cells (PBMCs) from a human subject were isolated from whole  
555 blood and transformed using Epstein-Barr virus (EBV), as previously described (Crowe, 2017).  
556 Briefly, transformed B cells were expanded and co-cultured with irradiated human PBMCs in  
557 96-well plates. Cell supernatants were screened by ELISA using recombinant HeV-RBP or NiV-  
558 RBP head domain proteins. Wells with positive reactivity then were fused to a human-mouse  
559 heteromyeloma cell line (HMMA 2.5) and plated by limiting dilution in 384-well plates. The  
560 resulting hybridomas were cloned as single cells by fluorescence-activated cell sorting (FACS)  
561 to produce clonal hybridoma cell lines. These clonal hybridoma cells were cultured in T-225  
562 flasks containing serum-free medium, and mAb was purified from spent medium by affinity  
563 chromatography on an ÄKTA<sup>TM</sup> pure Fast Protein Liquid Chromatography (FPLC) instrument  
564 (GE Healthcare).

565

### 566 **Generation of bispecific mAbs**

567 Bispecific mAbs that combined the antigen binding domains of HENV-117 and HENV-103 into  
568 a single molecule were designed, expressed, and purified as follows. The heavy chain of the  
569 HENV-117-103 DVD combines the heavy chain variable domains of first HENV-117, then  
570 HENV-103, each separated by a flexible linker, and then followed by the IgG1 human constant  
571 heavy chain domains. Similarly, the light chain of the HENV-117-103 DVD includes the light  
572 chain variable domains of both HENV-117 and HENV-103, separated by a flexible linker and  
573 then followed by a single human kappa light chain constant domain which naturally pairs with  
574 the corresponding DVD heavy chain. The HENV-117-103 Bis4Ab was constructed by inserting

575 a HENV-103 single-chain variable fragment (scFv) between CH<sub>1</sub> and CH<sub>2</sub> of the HENV-117  
576 heavy chain. The HENV-103 scFv in the bis4Ab format contains a poly glycine-serine linker  
577 between its variable domains, and the scFv unit is also flanked by poly glycine-serine linkers.  
578 The modified heavy chain is then paired with the standard HENV-117 light chain for expression  
579 and purification (Dimasi et al., 2019). The heavy and light chains of the HENV-117-103 DVD  
580 and the HENV-117-103 Bis4Ab were cloned into pcDNA3 expression vectors. For each of the  
581 bispecific mAbs, the corresponding heavy and light chain plasmids were chemically co-  
582 transfected into ExpiCHO cells (Gibco) and transiently expressed for 9 days. The supernatant  
583 was then clarified by centrifugation and filtration, prior to loading onto a MabSelect SuRe  
584 Protein A (GE Healthcare) affinity chromatography column using an ÄKTA™ Fast Protein  
585 Liquid Chromatography (FPLC) instrument (GE Healthcare). The column was washed with 1X  
586 PBS, and the mAbs were eluted with IgG Elution Buffer (Pierce). Following neutralization with  
587 1 M Tris pH 8.0 to pH ~7, the eluates were concentrated to 5 mg/ml in an Amicon 30K MWCO  
588 centrifugal filter (Millipore), and then sterile-filtered using a 0.22 µM syringe filter (Millex-GP).  
589

590 **HeV and NiV viruses.** NiV number 1999011924 was obtained from a patient from the 1999  
591 outbreak in Malaysia. The isolate of NiV<sub>B</sub> used was 200401066 and was obtained from a fatal  
592 human case during the outbreak in Rajbari, Bangladesh in 2004 and passaged on Vero E6 cell  
593 monolayer cultures twice, making this a passage 2 virus. HeV was obtained from a patient from  
594 the 1994 outbreak in Australia. All viruses were kindly provided by Dr. Thomas Ksiazek,  
595 UTMB. Each virus was propagated on Vero E6 cells in Eagle's minimal essential medium  
596 supplemented with 10% fetal calf serum. The NiV<sub>M</sub>, NiV<sub>B</sub> and HeV challenge virus stocks were  
597 assessed for the presence of endotoxin using The Endosafe-Portable Test System (PTS) (Charles

598 River Laboratories, Wilmington, MA). Each virus preparation was diluted 1:10 in Limulus  
599 Amebocyte Lysate (LAL) Reagent Water per the manufacturer's instructions, and endotoxin  
600 levels were tested in LAL Endosafe-PTS cartridges as directed by the manufacturer. Each  
601 preparation was found to be below detectable limits, whereas positive controls showed that the  
602 tests were valid. All experiments involving infectious henipaviruses were carried out at the  
603 UTMB Galveston National Laboratory under biosafety level 4 conditions.

604

605 **Neutralization assays.** The virus neutralizing activity concentrations were determined for NiV<sub>M</sub>,  
606 NiV<sub>B</sub>, and HeV using a plaque reduction assay. Briefly, antibodies were diluted two-fold from  
607 100 µg/mL to extinction and incubated with a target of ~100 plaque-forming units (pfu) of  
608 NiV<sub>M</sub>, NiV<sub>B</sub>, or HeV for 45 min at 37°C. Virus and antibody mixtures then were added to  
609 individual wells of six-well plates of Vero 76 cell monolayer cultures. Plates were fixed and  
610 stained with neutral red two days after infection, and plaques were counted 24 h after staining.  
611 Neutralization potency was calculated based on pfu for each virus in the well without antibody.  
612 The neutralization experiments were performed in triplicate, with independent virus preparations  
613 and duplicate readings for each replicate. Mean half-maximal inhibitory concentration (IC<sub>50</sub>)  
614 values were calculated as previously described (Ferrara and Temperton, 2018).

615

### 616 **Surface plasmon resonance (SPR) epitope binning**

617 A continuous flow micro-spotter (CFM) instrument (Carterra) was used to generate antibody-  
618 coated SPR sensor chips (Xantec) (Abdiche et al., 2014). Briefly, mAbs were diluted to 10  
619 µg/mL in sodium acetate pH 4.5 in a 96-well round bottom plate. A mirroring 96-well plate

620 containing activation buffer (EDC and sulfo-NHS in 10 mM MES pH 5.5) was used first to  
621 activate the gold-plated surface of the sensor chip, followed by association of antibodies. The  
622 coated chip then was moved to an IBIS-MX96 microarray-based surface plasmon resonance  
623 imager (Carterra), where it was quenched with 1 M ethanolamine to prevent further coupling of  
624 proteins. To bin antibodies, 100 mM HeV-RBP head domain was flowed over the coated sensor  
625 chip. One-by-one, antibodies diluted to 10  $\mu\text{g}/\text{mL}$  were tested for their ability to associate with  
626 antigen captured on the sensor chip. Carterra Epitope software was used to analyze data and  
627 construct competition-binding grids.

628

### 629 **Hydrogen-deuterium exchange mass spectrometry (HDX-MS) of Fab-HeV-RBP complexes.**

630 HDX-MS was performed as previously reported (Bennett et al., 2019). Briefly, antigen (HeV-  
631 RBP) and selected mAbs were prepared individually or in complex at a protein-concentration of  
632 10 pmol/ $\mu\text{L}$  in 1 $\times$  PBS pH 7.4 and incubated for 2 h at 0  $^{\circ}\text{C}$ . Deuterium labeling was performed  
633 by a 20-fold dilution of 3  $\mu\text{L}$  sample in PBS pH 7.4 in  $\text{D}_2\text{O}$  and incubation at 20  $^{\circ}\text{C}$  for 0 s, 100  
634 s, and 1000 s. The reaction was quenched by a 2-fold dilution in 1 $\times$  PBS, 4 M guanidinium/HCl,  
635 100 mM tris(2-carboxyethyl)phosphine to a final pH of 2.3 at 0  $^{\circ}\text{C}$ . Samples were injected  
636 immediately into a nano-ACQUITY UPLC system controlled by an HDX manager (Waters  
637 Corporation, Milford, MA, USA). Online pepsin digestion was performed at 15  $^{\circ}\text{C}$ , 10,000 psi at  
638 a flow of 100  $\mu\text{L}/\text{min}$  of 0.1% formic acid in  $\text{H}_2\text{O}$  using an immobilized-pepsin column. A  
639 Waters VanGuard<sup>TM</sup> BEH C18 1.7  $\mu\text{m}$  guard column was used to trap peptides at 0  $^{\circ}\text{C}$  for 6 min  
640 before separation on a Waters ACQUITY UPLC BEH C18 1.7  $\mu\text{m}$ , 1 mm  $\times$  100 mm column at a  
641 flow of 40  $\mu\text{L}/\text{min}$  at 0  $^{\circ}\text{C}$  with a 6 min gradient of 5 to 35% acetonitrile, 0.1% formic acid in  
642  $\text{H}_2\text{O}$ . UPLC effluent was directed into a Waters Xevo G2-XS with electrospray ionization and

643 lock-mass acquisition (human Glu-1-Fibrinopeptide B peptide,  $m/z=785.8427$ ) for peptide  
644 analysis in MS<sup>E</sup>-mode. The capillary was set to 2.8 kV, source-temperature to 80 °C, desolvation  
645 temperature to 175 °C, desolvation gas to 400 L/h and the instrument was scanned over a  $m/z$ -  
646 range of 50 to 2000. All experiments were carried out in triplicate. Data analysis was  
647 accomplished using Waters ProteinLynx Global Server 3.0.3 software (non-specific protease,  
648 min fragment ion matches per peptide of three, FDR 4% and oxidation of methionine as a  
649 variable modification) for peptide identification and DynamX 3.0 software (minimum intensity  
650 of 500, minimum products 3, minimum products per amino acid 0.3 and a mass error < 15 ppm)  
651 for deuterium uptake calculations. Results are reported as an average of triplicate analyses.

652

### 653 **Generation of VSV pseudotyped viruses bearing NiV<sub>B</sub> glycoproteins**

654 Recombinant VSVs containing genomic inserts for expression of NiV<sub>B</sub> G and F proteins were  
655 kindly provided by Chad Mire and generated as previously described (Mire et al., 2019). Stocks  
656 of each rVSV were propagated and titrated on VSV-G transfected BHK-21 (WI-2), with viral  
657 titers determined by counting GFP+ cells using a CTL S6 Analyzer instrument. To generate virus  
658 bearing both G and F glycoproteins, cells were inoculated with each VSV at MOI=5 and  
659 incubated for 48 hours. Cell supernatants were clarified by centrifugation. Resulting VSV-NiV<sub>B</sub>  
660 was titrated on Vero cell monolayers using an xCELLigence instrument to determine the lowest  
661 virus concentration that would induce CPE as measured by cell impedance.

662

### 663 **Cooperative binding of antibodies to antigen displayed on the surface of cells**

664 A construct containing cDNA encoding full-length HeV-RBP protein was transfected using  
665 polyethylenimine into 293F cells, and cells were cultured at 37 °C in 5% CO<sub>2</sub> for 3 days. Cells

666 subsequently were plated at 50,000 cells/well in V-bottom 96-well plates, washed, and incubated  
667 with either 20  $\mu\text{g}/\text{mL}$  primary mAb in 30  $\mu\text{L}$  or FACS buffer alone for 30 minutes at 4  $^{\circ}\text{C}$ .  
668 Without washing, 30  $\mu\text{L}$  serially diluted mAb labeled with Alexa Fluor 647 dye (ThermoFisher)  
669 was added to wells and incubated for 30 minutes at 4  $^{\circ}\text{C}$ . Cells were washed and resuspended in  
670 FACS buffer and analyzed using an iQue Plus flow cytometer (Intellicyt). Dead cells were  
671 excluded from analysis by fluorescent staining with 4',6-diamidino-2-phenylindole (DAPI).

672

### 673 **Negative stain electron microscopy**

674 For electron microscopy imaging of HeV-RBP protein and Fabs complex, we expressed the  
675 HeV-RBP full ectodomain (head domain with intact stalk domain) with a C-terminal  
676 polyhistidine tag. Expressed protein was isolated by metal affinity chromatography on HisTrap  
677 Excel columns (GE Healthcare), followed by GraFix methods using a 10% to 30% glycerol  
678 gradient and 0 to 0.1% glutaraldehyde gradient (Stark, 2010). Glutaraldehyde was quenched with  
679 1 M Tris-Cl after fractionation. 200  $\mu\text{L}$  fractions were analyzed by SDS-PAGE, with fractions  
680 corresponding to monomeric, dimeric, and tetrameric species pooled. Protein was then buffer  
681 exchanged into 50 mM Tris-Cl pH 7.5 containing 140 mM NaCl. Fabs corresponding to HENV-  
682 103 and HENV-117 were expressed and purified as previously described. Protein complexes  
683 were generated by incubation of HeV-RBP<sub>ecto</sub> dimer and the two Fab in a 1:5:5 molar ratio  
684 overnight at 4  $^{\circ}\text{C}$ . Approximately 3  $\mu\text{L}$  of the sample at  $\sim 10$  to 15  $\mu\text{g}/\text{mL}$  was applied to a glow-  
685 discharged grid with continuous carbon film on 400 square mesh copper electron microscopy  
686 grids (Electron Microscopy Sciences). Grids were stained with 0.75% uranyl formate (Ohi et al.,  
687 2004). Images were recorded on a Gatan US4000 4k  $\times$  4k CCD camera using an FEI TF20 (TFS)  
688 transmission electron microscope operated at 200 keV and control with SerialEM. All images



689 were taken at 62,000 $\times$  magnification with a pixel size of 1.757 Å per pixel in low-dose mode at a  
690 defocus of 1.5 to 1.8  $\mu$ m. The total dose for the micrographs was  $\sim$ 35 e $^-$  per Å $^2$ . Image  
691 processing was performed using the cryoSPARC software package. Images were imported, CTF-  
692 estimated and particles were picked automatically. The particles were extracted with a box size  
693 of 256 pixels and binned to 128 pixels (pixel size of 3.514 Å/pix) and 2D class averages were  
694 performed to achieve clean datasets. Classes were further classified (2D) to separated different  
695 complex variant and classes having the 2 Fab on one RBP domain were selected. *Ab-initio* was  
696 used to generate initial 3D volume that was further refined with a mask over one RBP-Fabs  
697 complex. The final refine volume has a resolution of  $\sim$ 15Å. Model docking to the EM map was  
698 done in Chimera (Pettersen et al., 2004). For the RBP head domain PDB: 6PDL was used and for  
699 the Fab PDB:12E8 or the prediction model of the Fv that was generated by SAbPred tool was  
700 used (Dunbar et al., 2016). The 3D EM map has been deposited into EMDB (EMDB XXX).  
701 Chimera software was used to make all structural figures.

702

### 703 **Neutralization synergy of VSV-NiV<sub>B</sub>**

704 VSV-NiV<sub>B</sub> pseudotype viruses were generated as described above. In 96-well plates, serial  
705 dilutions of “receptor-blocking” and “receptor-enhanced” mAbs were mixed in a matrix  
706 arrangement, followed by addition of equal volume of VSV-NiV<sub>B</sub> diluted 1:500 in DMEM.  
707 Mixtures were incubated for 1 hour at 37 °C prior to addition to Vero cell monolayers in  
708 xCELLigence 96-well E-plates containing 10,000 cells/well. Cells were incubated with virus and  
709 antibody for 1 hour at 37 °C, followed by addition of DMEM + 5% FBS to wells. Plates were  
710 placed back on the xCELLigence instrument for reading of cell impedance every 15 minutes for  
711 72 hours. Neutralization was determined by comparing cell index of treated wells vs. untreated

712 wells at a single time point (values output by xCELLigence instrument software). Neutralization  
713 values then were imported into SynergyFinder software (Ianevski et al., 2020), with delta scores  
714 calculated using the zero interactions potency (ZIP) synergy model.

715

### 716 **Neutralization synergy of rCedV chimeric viruses**

717 Recombinant Cedar virus chimeras displaying RBP and F proteins of HeV or NiV<sub>B</sub> were  
718 generated and validated as described elsewhere. Black-walled 96-well plates were coated with  
719 20,000 cells/well Vero E6 cells in DMEM + 10% Cosmic calf serum and incubated overnight.  
720 Approximately 24 hours later, HENV-103 and HENV-117 were diluted to indicated  
721 concentrations and incubated 1:1 with 4,000 PFU/well rCedV-HeV-GFP or rCedV-NiV<sub>B</sub>-GFP  
722 and incubated for 2 hours at 37 °C. Following incubation, 90 µL virus/antibody mixtures were  
723 added to aspirated cell monolayers and were incubated at 37 °C for 22 hours. Medium containing  
724 virus/antibody mixtures was aspirated, and cells were fixed with 100 µL/well 4% formalin for 20  
725 minutes at room temperature. After aspiration, cell monolayers were gently washed 4x with DI  
726 water. GFP foci were then imaged on a CTL S6 plate analyzer, and spots were counted using S6  
727 software. Percent neutralization was calculated by normalizing counts to a virus only control.  
728 Matrices were then imported into SynergyFinder and analyzed as described before.

729

### 730 **Antibody therapy in Syrian golden hamster model of Nipah Bangladesh**

731 3 to 5 week-old Syrian golden hamsters were inoculated with  $5 \times 10^6$  PFU Nipah Bangladesh  
732 (passage 3) via the intranasal route. At 24 hours post challenge, 5 animals per group were treated  
733 with 10 mg/kg antibody by intraperitoneal administration. Animals were monitored for 28 days  
734 for changes in weight, temperature, and clinical appearance. Animals were humanely euthanized

735 at the experimental endpoint. A single untreated animal served as a control in each study

736 highlighted.

737

738 **REFERENCES**

739

740 A summary of incidents of Hendra virus (HeV) in horses for Queensland and New South Wales  
741 since 1994 (Queensland Government, Business Queensland).

742 <https://www.business.qld.gov.au/industries/service-industries-professionals/service->

743 [industries/veterinary-surgeons/guidelines-hendra/incident-summary](https://www.business.qld.gov.au/industries/service-industries-professionals/service-industries/veterinary-surgeons/guidelines-hendra/incident-summary); website accessed 2.17.2021.

744

745 Abdiche, Y.N., Miles, A., Eckman, J., Foletti, D., Van Blarcom, T.J., Yeung, Y.A., Pons, J., and  
746 Rajpal, A. (2014). High-throughput epitope binning assays on label-free array-based biosensors  
747 can yield exquisite epitope discrimination that facilitates the selection of monoclonal antibodies  
748 with functional activity. *PLoS One* 9, e92451.

749

750 Aguilar, H.C., Ataman, Z.A., Aspericueta, V., Fang, A.Q., Stroud, M., Negrete, O.A.,  
751 Kammerer, R.A., and Lee, B. (2009). A novel receptor-induced activation site in the Nipah virus  
752 attachment glycoprotein (G) involved in triggering the fusion glycoprotein (F). *J Biol Chem* 284,  
753 1628-1635.

754

755 Arunkumar, G., Chandni, R., Mourya, D.T., Singh, S.K., Sadanandan, R., Sudan, P., Bhargava,  
756 B., Nipah Investigators, P., and Health Study, G. (2019). Outbreak investigation of Nipah virus  
757 disease in Kerala, India, 2018. *J Infect Dis* 219, 1867-1878.

758

759 Baker, K.S., Todd, S., Marsh, G., Fernandez-Loras, A., Suu-Ire, R., Wood, J.L.N., Wang, L.F.,  
760 Murcia, P.R., and Cunningham, A.A. (2012). Co-circulation of diverse paramyxoviruses in an  
761 urban African fruit bat population. *J Gen Virol* 93, 850-856.  
762  
763 Barr, J., Smith, C., Smith, I., de Jong, C., Todd, S., Melville, D., Broos, A., Cramer, S., Haining,  
764 J., Marsh, G., *et al.* (2015). Isolation of multiple novel paramyxoviruses from pteropid bat urine.  
765 *J Gen Virol* 96, 24-29.  
766  
767 Bennett, M.R., Bombardi, R.G., Kose, N., Parrish, E.H., Nagel, M.B., Petit, R.A., Read, T.D.,  
768 Schey, K.L., Thomsen, I.P., Skaar, E.P., *et al.* (2019). Human mAbs to *Staphylococcus aureus*  
769 IsdA Provide Protection Through Both Heme-Blocking and Fc-Mediated Mechanisms. *J Infect*  
770 *Dis* 219, 1264-1273.  
771  
772 Borisevich, V., Lee, B., Hickey, A., DeBuysscher, B., Broder, C.C., Feldmann, H., and Rockx,  
773 B. (2016). Escape from monoclonal antibody neutralization affects henipavirus fitness in vitro  
774 and in vivo. *J Infect Dis* 213, 448-455.  
775  
776 Bossart, K.N., Geisbert, T.W., Feldmann, H., Zhu, Z., Feldmann, F., Geisbert, J.B., Yan, L.,  
777 Feng, Y.R., Brining, D., Scott, D., *et al.* (2011). A neutralizing human monoclonal antibody  
778 protects african green monkeys from hendra virus challenge. *Sci Transl Med* 3, 105ra103.  
779  
780 Bossart, K.N., Zhu, Z., Middleton, D., Klippel, J., Cramer, G., Bingham, J., McEachern, J.A.,  
781 Green, D., Hancock, T.J., Chan, Y.P., *et al.* (2009). A neutralizing human monoclonal antibody

782 protects against lethal disease in a new ferret model of acute nipah virus infection. PLoS Pathog  
783 5, e1000642.

784

785 Chadha, M.S., Comer, J.A., Lowe, L., Rota, P.A., Rollin, P.E., Bellini, W.J., Ksiazek, T.G., and  
786 Mishra, A. (2006). Nipah virus-associated encephalitis outbreak, Siliguri, India. *Emerg Infect*  
787 *Dis* 12, 235-240.

788

789 Chua, K.B., Goh, K.J., Wong, K.T., Kamarulzaman, A., Tan, P.S., Ksiazek, T.G., Zaki, S.R.,  
790 Paul, G., Lam, S.K., and Tan, C.T. (1999). Fatal encephalitis due to Nipah virus among pig-  
791 farmers in Malaysia. *Lancet* 354, 1257-1259.

792

793 Chua, K.B., Koh, C.L., Hooi, P.S., Wee, K.F., Khong, J.H., Chua, B.H., Chan, Y.P., Lim, M.E.,  
794 and Lam, S.K. (2002). Isolation of Nipah virus from Malaysian Island flying-foxes. *Microbes*  
795 *Infect* 4, 145-151.

796

797 Clayton, B.A., Middleton, D., Bergfeld, J., Haining, J., Arkinstall, R., Wang, L., and Marsh,  
798 G.A. (2012). Transmission routes for nipah virus from Malaysia and Bangladesh. *Emerg Infect*  
799 *Dis* 18, 1983-1993.

800

801 Crowe, J.E., Jr. (2017). Principles of broad and potent antiviral human antibodies: Insights for  
802 vaccine design. *Cell Host Microbe* 22, 193-206.

803

804 Dang, H.V., Chan, Y.P., Park, Y.J., Snijder, J., Da Silva, S.C., Vu, B., Yan, L., Feng, Y.R.,  
805 Rockx, B., Geisbert, T.W., *et al.* (2019). An antibody against the F glycoprotein inhibits Nipah  
806 and Hendra virus infections. *Nat Struct Mol Biol* 26, 980-987.  
807  
808 Dimasi, N., Fleming, R., Wu, H., and Gao, C. (2019). Molecular engineering strategies and  
809 methods for the expression and purification of IgG1-based bispecific bivalent antibodies.  
810 *Methods* 154, 77-86.  
811  
812 Dong, J., Cross, R.W., Doyle, M.P., Kose, N., Mousa, J.J., Annand, E.J., Borisevich, V., Agans,  
813 K.N., Sutton, R., Nargi, R., *et al.* (2020). Potent henipavirus neutralization by antibodies  
814 recognizing diverse sites on Hendra and Nipah virus receptor binding protein. *Cell* 183, 1536-  
815 1550 e1517.  
816  
817 Drexler, J.F., Corman, V.M., Muller, M.A., Maganga, G.D., Vallo, P., Binger, T., Gloza-Rausch,  
818 F., Cottontail, V.M., Rasche, A., Yordanov, S., *et al.* (2012). Bats host major mammalian  
819 paramyxoviruses. *Nat Commun* 3, 796.  
820  
821 Dunbar, J., Krawczyk, K., Leem, J., Marks, C., Nowak, J., Regep, C., Georges, G., Kelm, S.,  
822 Popovic, B., and Deane, C.M. (2016). SAbPred: a structure-based antibody prediction server.  
823 *Nucleic Acids Res* 44, W474-478.  
824  
825 Eaton, B.T., Broder, C.C., Middleton, D., and Wang, L.F. (2006). Hendra and Nipah viruses:  
826 different and dangerous. *Nat Rev Microbiol* 4, 23-35.

827

828 Escaffre, O., Borisevich, V., Carmical, J.R., Prusak, D., Prescott, J., Feldmann, H., and Rockx,  
829 B. (2013). Henipavirus pathogenesis in human respiratory epithelial cells. *J Virol* 87, 3284-3294.

830 Ferrara, F., and Temperton, N. (2018). Pseudotype neutralization assays: From laboratory bench  
831 to data analysis. *Methods Protoc* 1.

832

833 Field, H.E. (2016). Hendra virus ecology and transmission. *Curr Opin Virol* 16, 120-125.

834

835 Geisbert, T.W., Mire, C.E., Geisbert, J.B., Chan, Y.P., Agans, K.N., Feldmann, F., Fenton, K.A.,  
836 Zhu, Z., Dimitrov, D.S., Scott, D.P., *et al.* (2014). Therapeutic treatment of Nipah virus infection  
837 in nonhuman primates with a neutralizing human monoclonal antibody. *Sci Transl Med* 6,  
838 242ra282.

839

840 Gomez Roman, R., Wang, L.F., Lee, B., Halpin, K., de Wit, E., Broder, C.C., Rahman, M.,  
841 Kristiansen, P., and Saville, M. (2020). Nipah@20: Lessons learned from another virus with  
842 pandemic potential. *mSphere* 5.

843

844 Greaney, A.J., Starr, T.N., Gilchuk, P., Zost, S.J., Binshtein, E., Loes, A.N., Hilton, S.K.,  
845 Huddleston, J., Eguia, R., Crawford, K.H.D., *et al.* (2020). Complete mapping of mutations to  
846 the SARS-CoV-2 spike receptor-binding domain that escape antibody recognition. *bioRxiv*.

847



848 Guillaume, V., Contamin, H., Loth, P., Georges-Courbot, M.C., Lefevre, A., Marianneau, P.,  
849 Chua, K.B., Lam, S.K., Buckland, R., Deubel, V., *et al.* (2004). Nipah virus: vaccination and  
850 passive protection studies in a hamster model. *J Virol* 78, 834-840.  
851  
852 Guillaume, V., Contamin, H., Loth, P., Grosjean, I., Courbot, M.C., Deubel, V., Buckland, R.,  
853 and Wild, T.F. (2006). Antibody prophylaxis and therapy against Nipah virus infection in  
854 hamsters. *J Virol* 80, 1972-1978.  
855  
856 Gurley, E.S., Montgomery, J.M., Hossain, M.J., Bell, M., Azad, A.K., Islam, M.R., Molla, M.A.,  
857 Carroll, D.S., Ksiazek, T.G., Rota, P.A., *et al.* (2007). Person-to-person transmission of Nipah  
858 virus in a Bangladeshi community. *Emerg Infect Dis* 13, 1031-1037.  
859  
860 Halpin, K., Hyatt, A.D., Fogarty, R., Middleton, D., Bingham, J., Epstein, J.H., Rahman, S.A.,  
861 Hughes, T., Smith, C., Field, H.E., *et al.* (2011). Pteropid bats are confirmed as the reservoir  
862 hosts of henipaviruses: a comprehensive experimental study of virus transmission. *Am J Trop*  
863 *Med Hyg* 85, 946-951.  
864  
865 Halpin, K., Young, P.L., Field, H.E., and Mackenzie, J.S. (2000). Isolation of Hendra virus from  
866 pteropid bats: a natural reservoir of Hendra virus. *J Gen Virol* 81, 1927-1932.  
867  
868 Howell, K.A., Brannan, J.M., Bryan, C., McNeal, A., Davidson, E., Turner, H.L., Vu, H.,  
869 Shulenin, S., He, S., Kuehne, A., *et al.* (2017). Cooperativity enables non-neutralizing antibodies  
870 to neutralize ebolavirus. *Cell Rep* 19, 413-424.

871

872 Ianevski, A., He, L., Aittokallio, T., and Tang, J. (2020). SynergyFinder: a web application for  
873 analyzing drug combination dose-response matrix data. *Bioinformatics*.

874

875 Kessler, M.K., Becker, D.J., Peel, A.J., Justice, N.V., Lunn, T., Crowley, D.E., Jones, D.N., Eby,  
876 P., Sanchez, C.A., and Plowright, R.K. (2018). Changing resource landscapes and spillover of  
877 henipaviruses. *Ann N Y Acad Sci 1429*, 78-99.

878

879 Lee, B., and Ataman, Z.A. (2011). Modes of paramyxovirus fusion: a Henipavirus perspective.  
880 *Trends Microbiol 19*, 389-399.

881

882 Liu, Q., Stone, J.A., Bradel-Tretheway, B., Dabundo, J., Benavides Montano, J.A., Santos-  
883 Montanez, J., Biering, S.B., Nicola, A.V., Iorio, R.M., Lu, X., *et al.* (2013). Unraveling a three-  
884 step spatiotemporal mechanism of triggering of receptor-induced Nipah virus fusion and cell  
885 entry. *PLoS Pathog 9*, e1003770.

886

887 Luis, A.D., O'Shea, T.J., Hayman, D.T.S., Wood, J.L.N., Cunningham, A.A., Gilbert, A.T.,  
888 Mills, J.N., and Webb, C.T. (2015). Network analysis of host-virus communities in bats and  
889 rodents reveals determinants of cross-species transmission. *Ecol Lett 18*, 1153-1162.

890

891 Martin, G., Yanez-Arenas, C., Chen, C., Plowright, R.K., Webb, R.J., and Skerratt, L.F. (2018).  
892 Climate change could increase the geographic extent of Hendra virus spillover risk. *Ecohealth*  
893 *15*, 509-525.

894

895 Meissner, H.C., Welliver, R.C., Chartrand, S.A., Law, B.J., Weisman, L.E., Dorkin, H.L., and  
896 Rodriguez, W.J. (1999). Immunoprophylaxis with palivizumab, a humanized respiratory  
897 syncytial virus monoclonal antibody, for prevention of respiratory syncytial virus infection in  
898 high risk infants: a consensus opinion. *Pediatr Infect Dis J* 18, 223-231.

899

900 Merz, D.C., Scheid, A., and Choppin, P.W. (1980). Importance of antibodies to the fusion  
901 glycoprotein of paramyxoviruses in the prevention of spread of infection. *J Exp Med* 151, 275-  
902 288.

903

904 Miglietta, R., Pastori, C., Venuti, A., Ochsenbauer, C., and Lopalco, L. (2014). Synergy in  
905 monoclonal antibody neutralization of HIV-1 pseudoviruses and infectious molecular clones. *J*  
906 *Transl Med* 12, 346.

907

908 Mire, C.E., Chan, Y.P., Borisevich, V., Cross, R.W., Yan, L., Agans, K.N., Dang, H.V., Veessler,  
909 D., Fenton, K.A., Geisbert, T.W., *et al.* (2020). A cross-reactive humanized monoclonal antibody  
910 targeting fusion glycoprotein function protects ferrets against lethal Nipah virus and Hendra  
911 virus infection. *J Infect Dis* 221, S471-S479.

912

913 Mire, C.E., Geisbert, J.B., Agans, K.N., Versteeg, K.M., Deer, D.J., Satterfield, B.A., Fenton,  
914 K.A., and Geisbert, T.W. (2019). Use of single-injection recombinant Vesicular Stomatitis Virus  
915 vaccine to protect nonhuman primates against lethal Nipah virus disease. *Emerg Infect Dis* 25,  
916 1144-1152.

917

918 Mire, C.E., Satterfield, B.A., Geisbert, J.B., Agans, K.N., Borisevich, V., Yan, L., Chan, Y.P.,  
919 Cross, R.W., Fenton, K.A., Broder, C.C., *et al.* (2016). Pathogenic differences between Nipah  
920 virus Bangladesh and Malaysia strains in primates: Implications for antibody therapy. *Sci Rep* 6,  
921 30916.

922

923 Morens, D.M., and Fauci, A.S. (2020). Emerging pandemic diseases: How we got to COVID-19.  
924 *Cell* 182, 1077-1092.

925

926 Murray, K., Rogers, R., Selvey, L., Selleck, P., Hyatt, A., Gould, A., Gleeson, L., Hooper, P.,  
927 and Westbury, H. (1995a). A novel morbillivirus pneumonia of horses and its transmission to  
928 humans. *Emerg Infect Dis* 1, 31-33.

929

930 Murray, K., Selleck, P., Hooper, P., Hyatt, A., Gould, A., Gleeson, L., Westbury, H., Hiley, L.,  
931 Selvey, L., Rodwell, B., *et al.* (1995b). A morbillivirus that caused fatal disease in horses and  
932 humans. *Science* 268, 94-97.

933

934 Ohi, M., Li, Y., Cheng, Y., and Walz, T. (2004). Negative staining and image classification -  
935 powerful tools in modern electron microscopy. *Biol Proced Online* 6, 23-34.

936

937 Peel, A.J., Wells, K., Giles, J., Boyd, V., Burroughs, A., Edson, D., Crameri, G., Baker, M.L.,  
938 Field, H., Wang, L.F., *et al.* (2019). Synchronous shedding of multiple bat paramyxoviruses  
939 coincides with peak periods of Hendra virus spillover. *Emerg Microbes Infect* 8, 1314-1323.

940

941 Pettersen, E.F., Goddard, T.D., Huang, C.C., Couch, G.S., Greenblatt, D.M., Meng, E.C., and  
942 Ferrin, T.E. (2004). UCSF Chimera--a visualization system for exploratory research and  
943 analysis. *J Comput Chem* 25, 1605-1612.

944

945 Plowright, R.K., Eby, P., Hudson, P.J., Smith, I.L., Westcott, D., Bryden, W.L., Middleton, D.,  
946 Reid, P.A., McFarlane, R.A., Martin, G., *et al.* (2015). Ecological dynamics of emerging bat  
947 virus spillover. *Proc Biol Sci* 282, 20142124.

948

949 Rima, B., Balkema-Buschmann, A., Dundon, W.G., Duprex, P., Easton, A., Fouchier, R.,  
950 Kurath, G., Lamb, R., Lee, B., Rota, P., *et al.* (2019). ICTV Virus Taxonomy Profile:  
951 Paramyxoviridae. *J Gen Virol* 100, 1593-1594.

952

953 Sasaki, M., Setiyono, A., Handharyani, E., Rahmadani, I., Taha, S., Adiani, S., Subangkit, M.,  
954 Sawa, H., Nakamura, I., and Kimura, T. (2012). Molecular detection of a novel paramyxovirus in  
955 fruit bats from Indonesia. *Virology* 9, 240.

956

957 Selvey, L.A., Wells, R.M., McCormack, J.G., Ansford, A.J., Murray, K., Rogers, R.J.,  
958 Lavercombe, P.S., Selleck, P., and Sheridan, J.W. (1995). Infection of humans and horses by a  
959 newly described morbillivirus. *Med J Aust* 162, 642-645.

960

961 Soman Pillai, V., Krishna, G., and Valiya Veetil, M. (2020). Nipah virus: Past outbreaks and  
962 future containment. *Viruses* 12.

963

964

965 Stark, H. (2010). GraFix: stabilization of fragile macromolecular complexes for single particle  
966 cryo-EM. *Methods Enzymol* *481*, 109-126.

967

968 Sweileh, W.M. (2017). Global research trends of World Health Organization's top eight  
969 emerging pathogens. *Global Health* *13*, 9.

970

971 Thanabalasuriar, A., Surewaard, B.G., Willson, M.E., Neupane, A.S., Stover, C.K., Warrenner, P.,  
972 Wilson, G., Keller, A.E., Sellman, B.R., DiGiandomenico, A., *et al.* (2017). Bispecific antibody  
973 targets multiple *Pseudomonas aeruginosa* evasion mechanisms in the lung vasculature. *J Clin*  
974 *Invest* *127*, 2249-2261.

975

976 Vidgen, M.E., de Jong, C., Rose, K., Hall, J., Field, H.E., and Smith, C.S. (2015). Novel  
977 paramyxoviruses in Australian flying-fox populations support host-virus co-evolution. *J Gen*  
978 *Virol* *96*, 1619-1625.

979

980 Walsh, M.G., Wiethoelter, A., and Haseeb, M.A. (2017). The impact of human population  
981 pressure on flying fox niches and the potential consequences for Hendra virus spillover. *Sci Rep*  
982 *7*, 8226.

983

984 Welch, S.R., Tilston, N.L., Lo, M.K., Whitmer, S.L.M., Harmon, J.R., Scholte, F.E.M.,  
985 Spengler, J.R., Duprex, W.P., Nichol, S.T., and Spiropoulou, C.F. (2020). Inhibition of Nipah  
986 virus by defective interfering particles. *J Infect Dis* 221, S460-S470.  
987  
988 Wong, K.T., Grosjean, I., Brisson, C., Blanquier, B., Fevre-Montange, M., Bernard, A., Loth, P.,  
989 Georges-Courbot, M.C., Chevallier, M., Akaoka, H., *et al.* (2003). A golden hamster model for  
990 human acute Nipah virus infection. *Am J Pathol* 163, 2127-2137.  
991  
992 Wu, C., Ying, H., Grinnell, C., Bryant, S., Miller, R., Clabbers, A., Bose, S., McCarthy, D., Zhu,  
993 R.R., Santora, L., *et al.* (2007). Simultaneous targeting of multiple disease mediators by a dual-  
994 variable-domain immunoglobulin. *Nat Biotechnol* 25, 1290-1297.  
995  
996 Zhu, Z., Bossart, K.N., Bishop, K.A., Crameri, G., Dimitrov, A.S., McEachern, J.A., Feng, Y.,  
997 Middleton, D., Wang, L.F., Broder, C.C., *et al.* (2008). Exceptionally potent cross-reactive  
998 neutralization of Nipah and Hendra viruses by a human monoclonal antibody. *J Infect Dis* 197,  
999 846-853.  
1000  
1001 Zhu, Z., Dimitrov, A.S., Bossart, K.N., Crameri, G., Bishop, K.A., Choudhry, V., Mungall, B.A.,  
1002 Feng, Y.R., Choudhary, A., Zhang, M.Y., *et al.* (2006). Potent neutralization of Hendra and  
1003 Nipah viruses by human monoclonal antibodies. *J Virol* 80, 891-899.  
1004

1005 Zost, S.J., Gilchuk, P., Case, J.B., Binshtein, E., Chen, R.E., Nkolola, J.P., Schafer, A., Reidy,  
1006 J.X., Trivette, A., Nargi, R.S., *et al.* (2020a). Potently neutralizing and protective human  
1007 antibodies against SARS-CoV-2. *Nature* 584, 443-449.  
1008  
1009 Zost, S.J., Gilchuk, P., Chen, R.E., Case, J.B., Reidy, J.X., Trivette, A., Nargi, R.S., Sutton, R.E.,  
1010 Suryadevara, N., Chen, E.C., *et al.* (2020b). Rapid isolation and profiling of a diverse panel of  
1011 human monoclonal antibodies targeting the SARS-CoV-2 spike protein. *Nat Med* 26, 1422-1427.  
1012



A.

Second antibody applied

First antibody applied

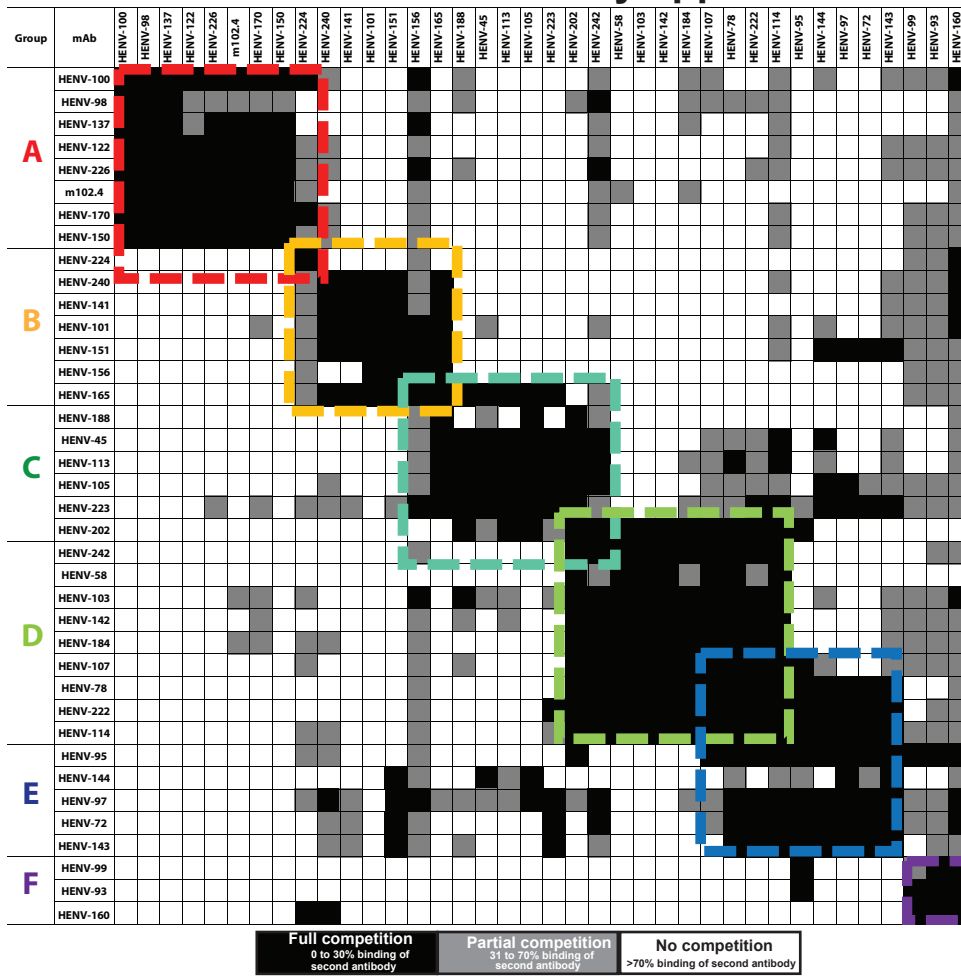

Full competition 0 to 30% binding of second antibody  
 Partial competition 31 to 70% binding of second antibody  
 No competition >70% binding of second antibody

B.

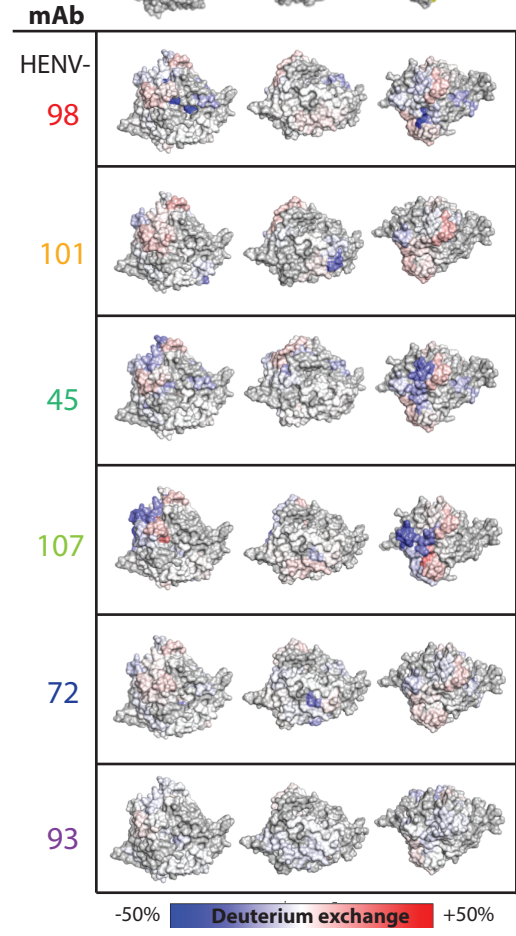

C.

| Group | mAb      | Binding EC <sub>50</sub> (ng/mL) |            |                          |                          | Neutralization IC <sub>50</sub> (ng/mL) |                  |                  |
|-------|----------|----------------------------------|------------|--------------------------|--------------------------|-----------------------------------------|------------------|------------------|
|       |          | HeV-RBP FE                       | HeV-RBP HD | NiV <sub>1</sub> -RBP HD | NiV <sub>2</sub> -RBP HD | HeV                                     | NiV <sub>1</sub> | NiV <sub>2</sub> |
| A     | HENV-100 | 28                               | 105        | 65                       | 66                       | 18                                      | 21               | 43               |
|       | HENV-226 | 38                               | 99         | 94                       | 88                       | 34                                      | 51               | 79               |
|       | HENV-170 | 40                               | 135        | 105                      | 98                       | 128                                     | 142              | 448              |
|       | HENV-98  | 44                               | 132        | 101                      | 94                       | 18                                      | 23               | 58               |
|       | HENV-150 | 45                               | 85         | 71                       | 68                       | 201                                     | 81               | 185              |
|       | HENV-137 | 49                               | 179        | 122                      | 134                      | 32                                      | 32               | 194              |
|       | HENV-122 | 77                               | 155        | 141                      | 118                      | 67                                      | 43               | 72               |
| B     | HENV-117 | 109                              | 183        | 176                      | 174                      | 14                                      | 8                | 15               |
|       | HENV-224 | 28                               | 79         | >                        | >                        | 378                                     | >                | >                |
|       | HENV-151 | 34                               | 46         | >                        | >                        | 76                                      | >                | >                |
|       | HENV-101 | 39                               | 39         | >                        | >                        | 61                                      | >                | >                |
| B/C   | HENV-141 | 53                               | 62         | 59                       | 55                       | 171                                     | 268              | 2,758            |
|       | HENV-156 | 54                               | 74         | 309                      | 656                      | 359                                     | 2,255            | >                |
|       | HENV-240 | 93                               | 140        | >                        | >                        | 753                                     | >                | >                |
| C     | HENV-165 | 49                               | 49         | >                        | >                        | 148                                     | >                | >                |
|       | HENV-188 | 29                               | 56         | 104                      | 176                      | 3,184                                   | 5,640            | >                |
|       | HENV-45  | 31                               | 69         | 110                      | >                        | 61                                      | 3,619            | >                |
| C/D   | HENV-113 | 31                               | 36         | 73                       | 245                      | 64                                      | 1,045            | 8,112            |
|       | HENV-105 | 38                               | 76         | >                        | >                        | 112                                     | >                | >                |
|       | HENV-223 | 49                               | 46         | >                        | >                        | 56                                      | >                | >                |
| D     | HENV-202 | 368                              | >          | >                        | >                        | 9,251                                   | 7,976            | >                |
|       | HENV-242 | 650                              | 3,683      | 1,182                    | 2,850                    | >                                       | 7,715            | >                |
|       | HENV-142 | 50                               | 514        | 309                      | 1,260                    | 1,049                                   | 1,224            | 2,311            |
| D/E   | HENV-103 | 53                               | 269        | 135                      | 370                      | 445                                     | 420              | 507              |
|       | HENV-184 | 61                               | 993        | 665                      | 1,942                    | 2,989                                   | 500              | 1,593            |
|       | HENV-58  | 90                               | 373        | 275                      | 472                      | 2,182                                   | 129              | 900              |
| E     | HENV-107 | 113                              | 519        | >                        | >                        | 3,734                                   | >                | >                |
|       | HENV-78  | 164                              | 283        | 415                      | >                        | >                                       | >                | >                |
|       | HENV-222 | 292                              | 1,640      | 265                      | 2,327                    | >                                       | 9,761            | >                |
|       | HENV-114 | 1,510                            | >          | 1,555                    | >                        | >                                       | >                | >                |
| F     | HENV-95  | 37                               | 186        | >                        | >                        | 3,629                                   | >                | ></              |

## A. Ephrin-B2 competition binding

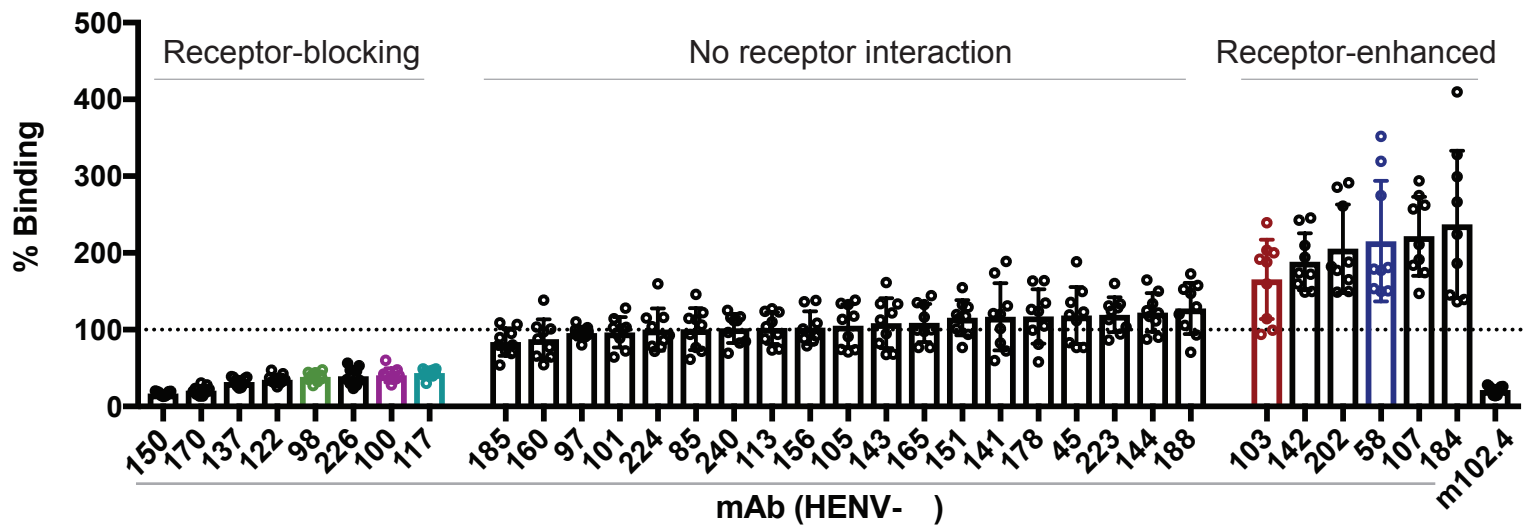

## B. nsEM 3D reconstruction

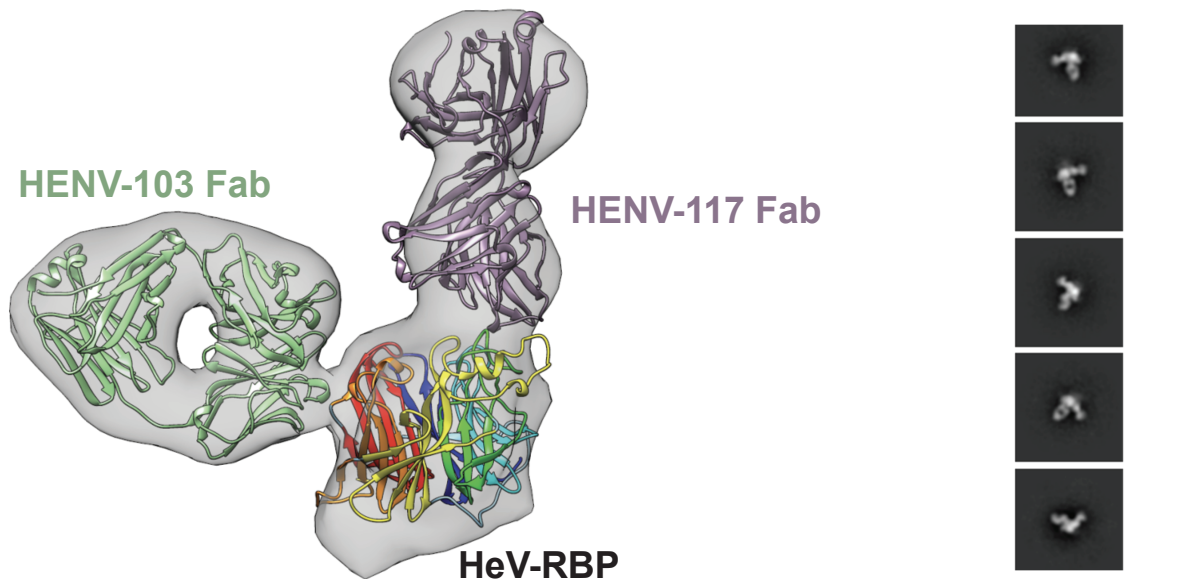

# Nipah Bangladesh virus challenge

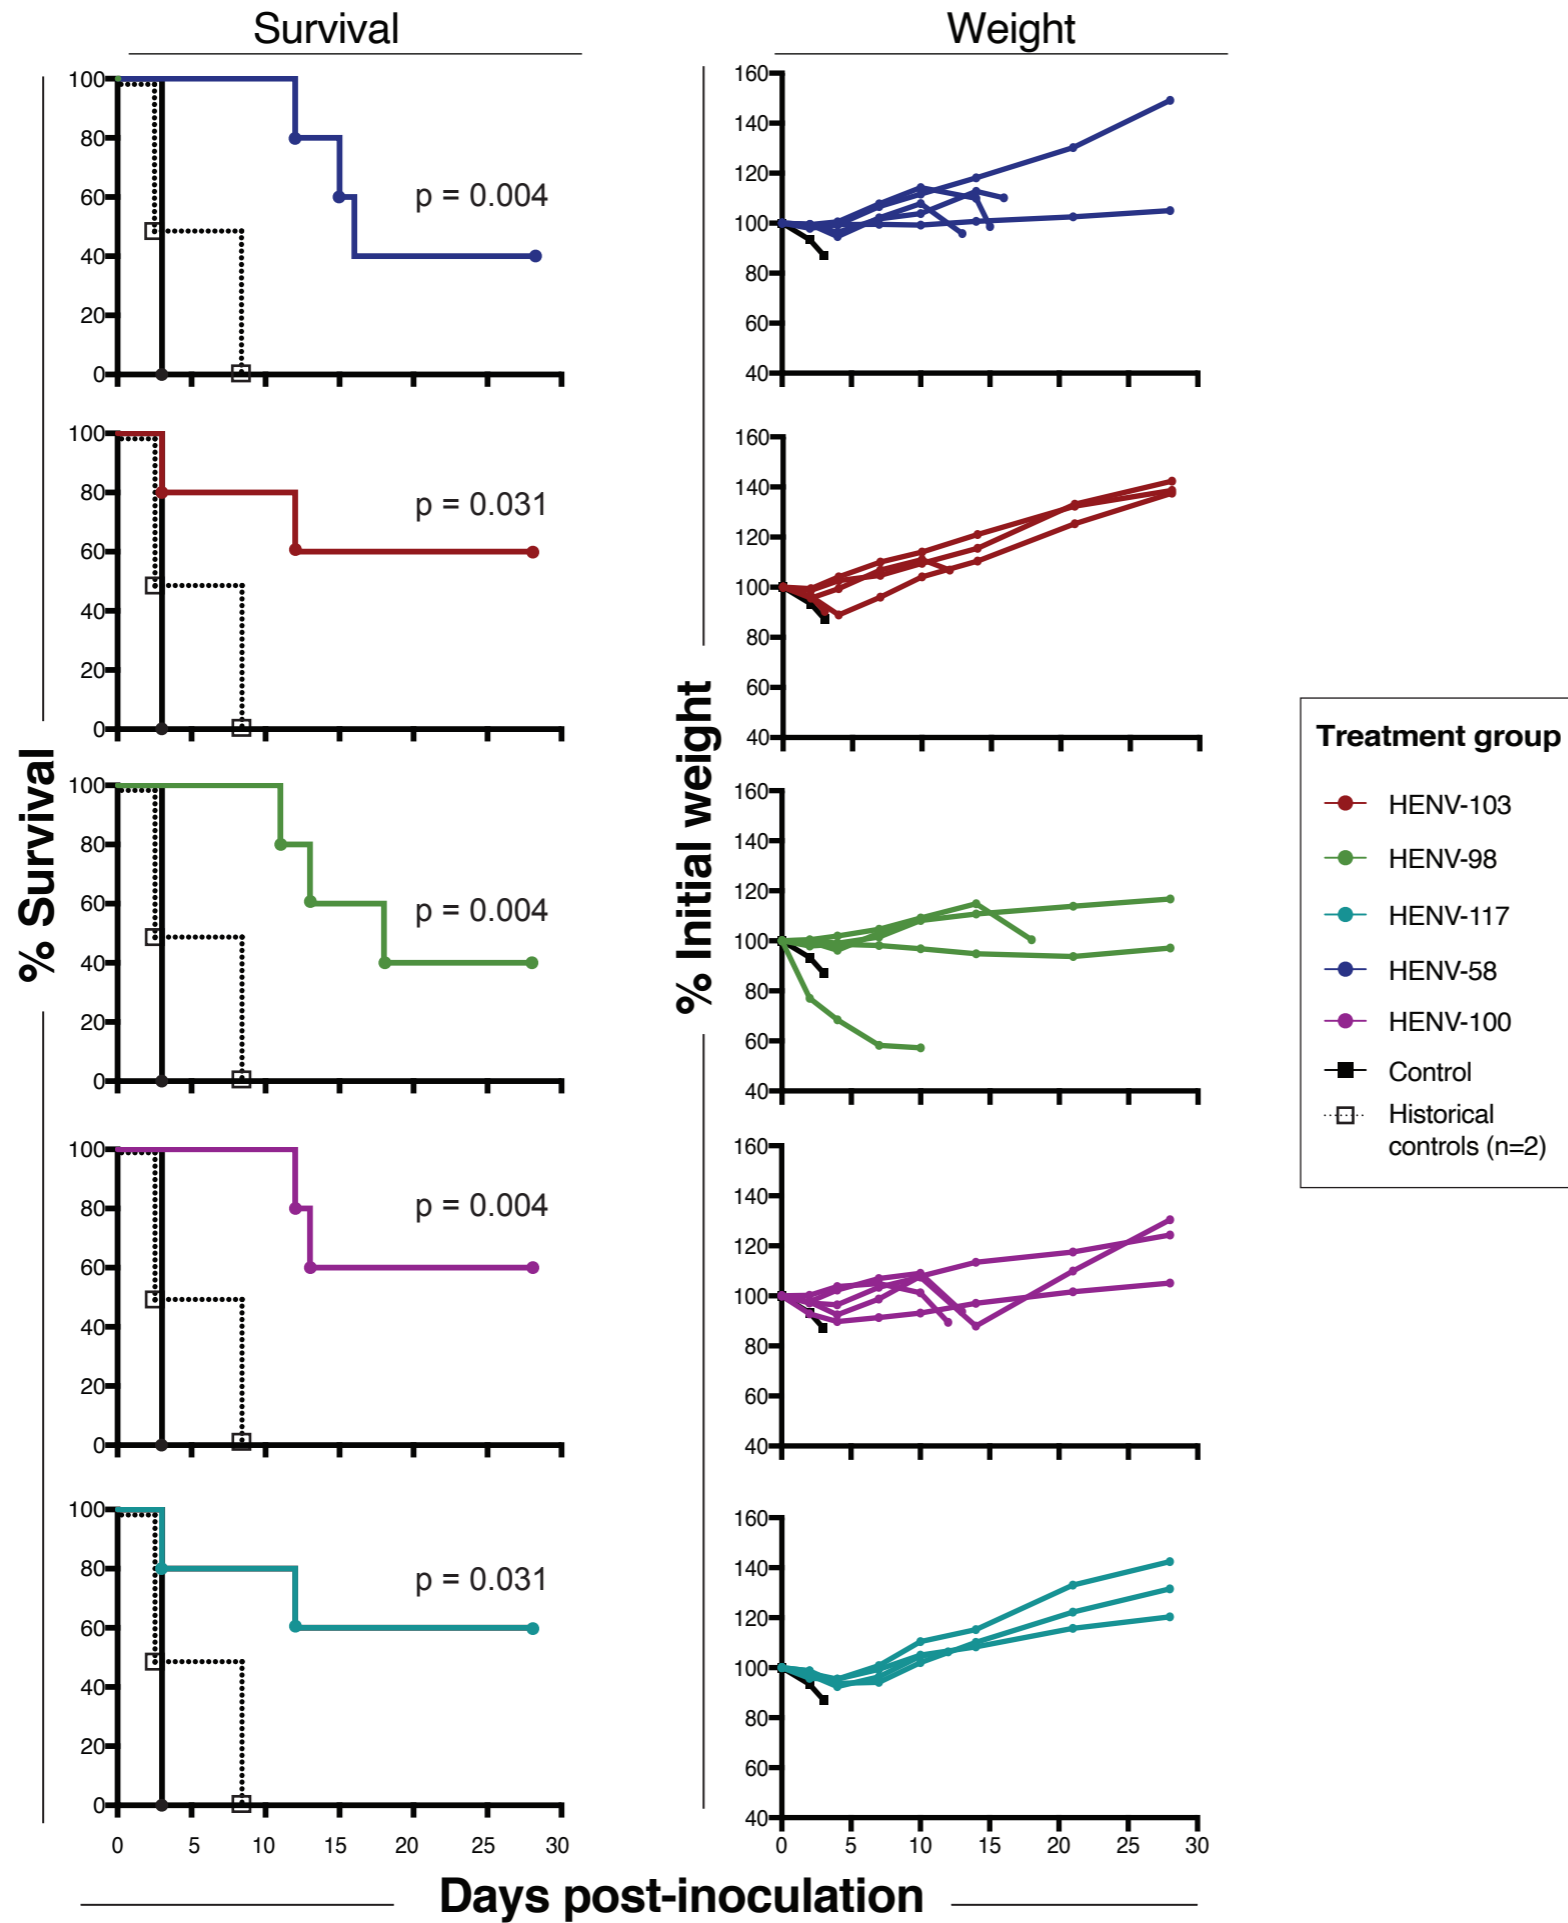

## A. Binding to HeV-RBP

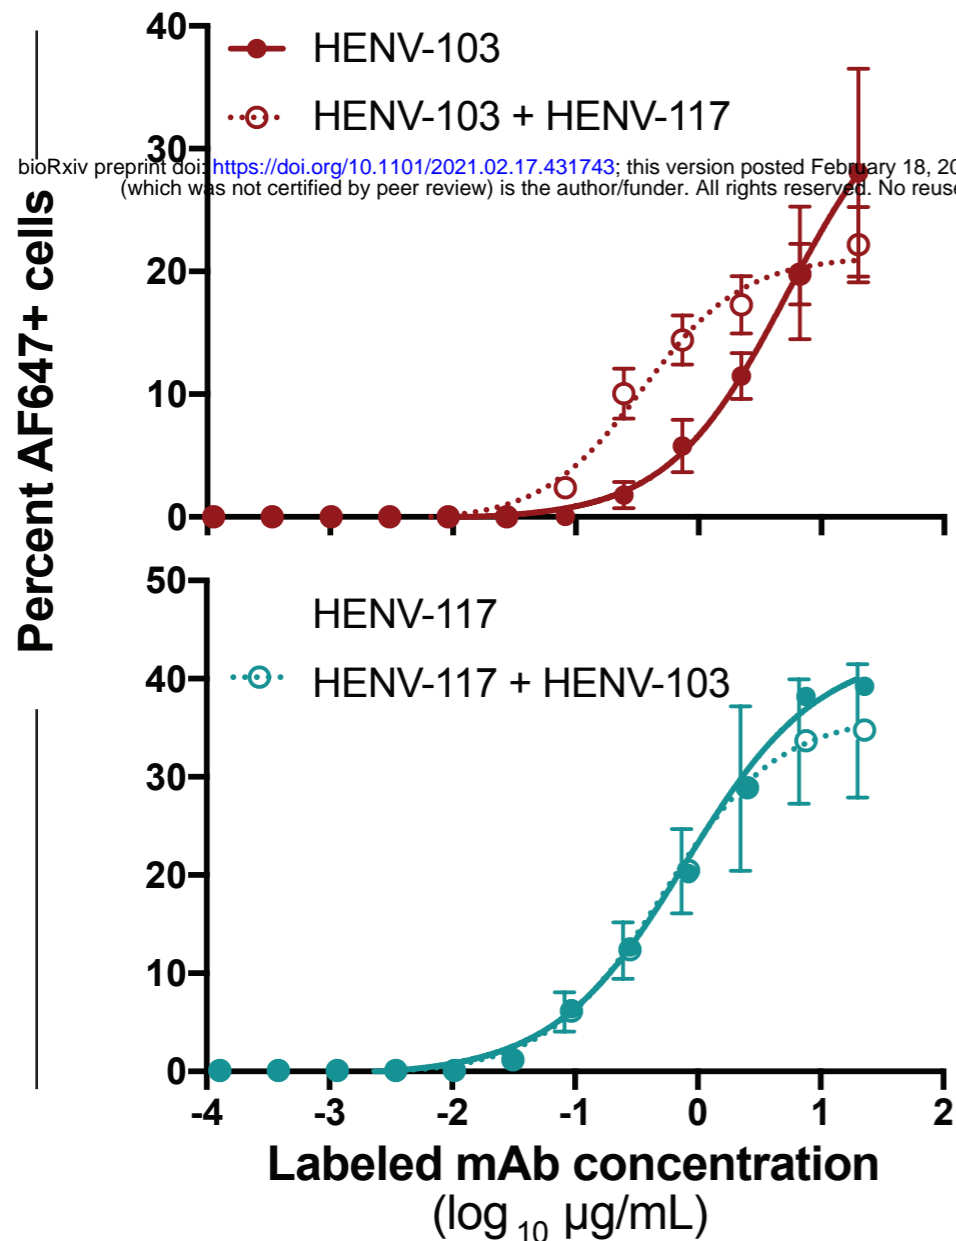

## B. HENV-103 binding to HeV-RBP

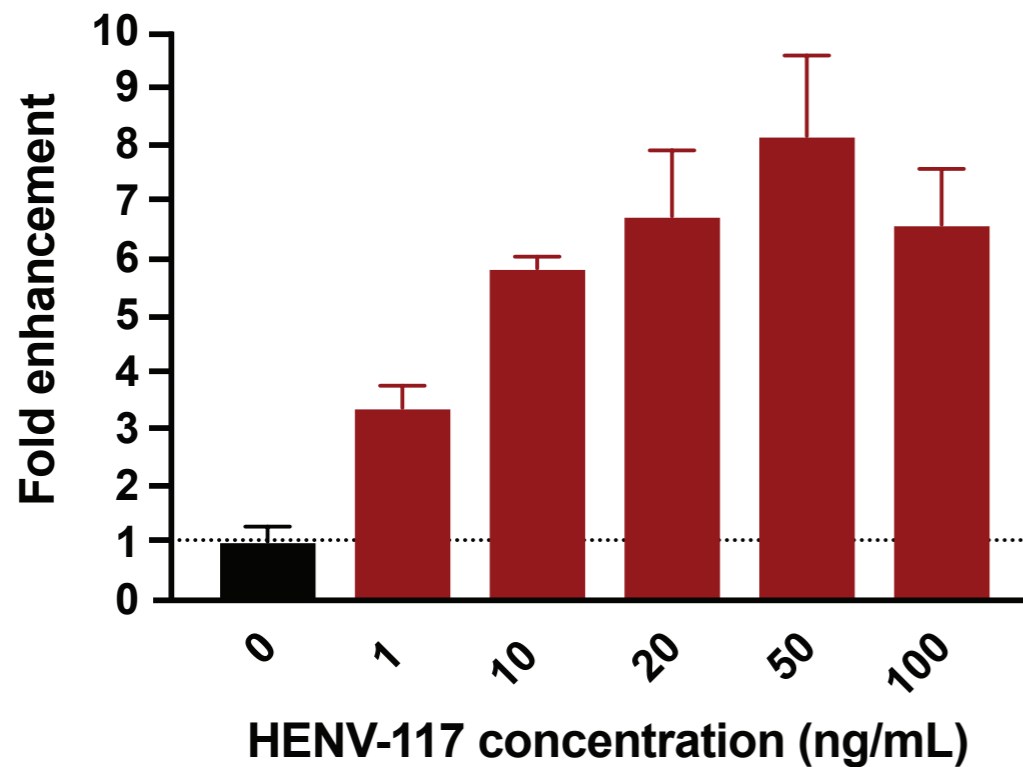

## C. rCedV-HeV neutralization synergy

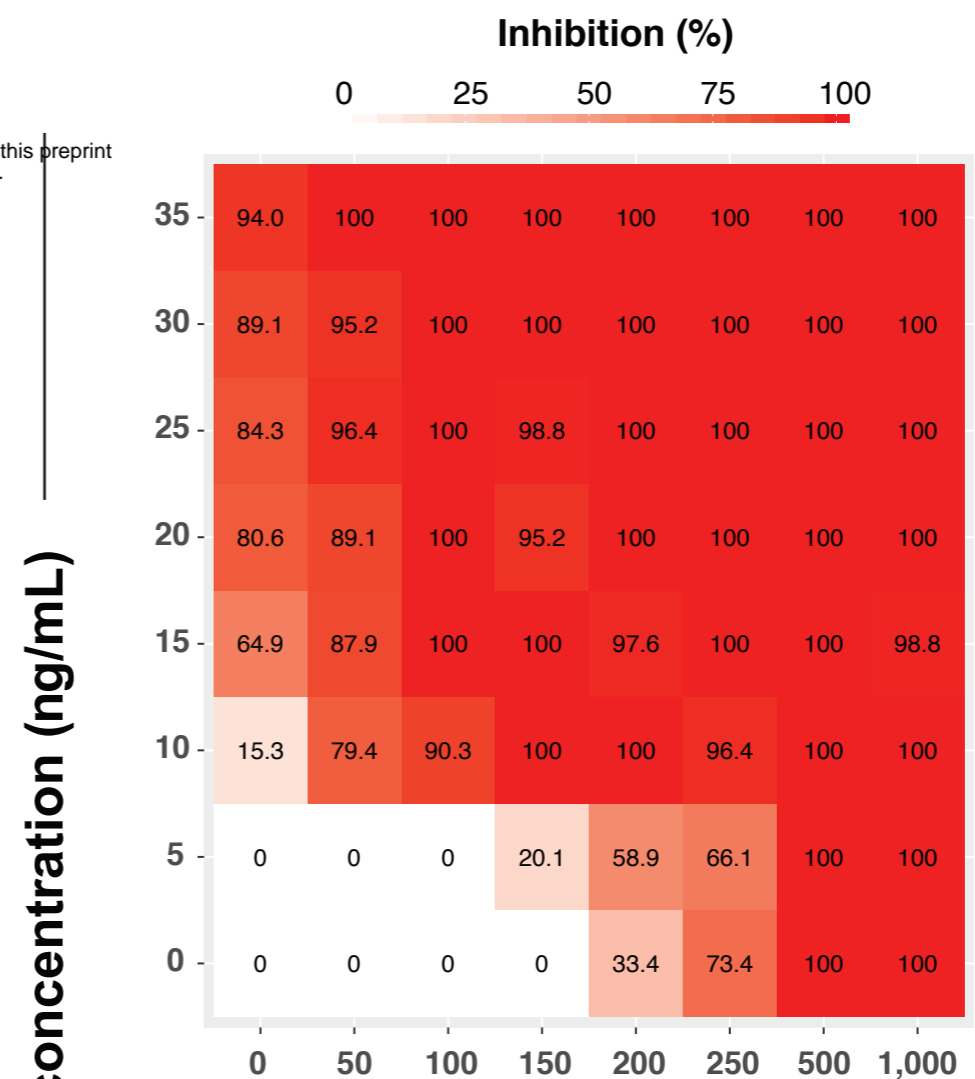

**HENV-117 concentration (ng/mL)**

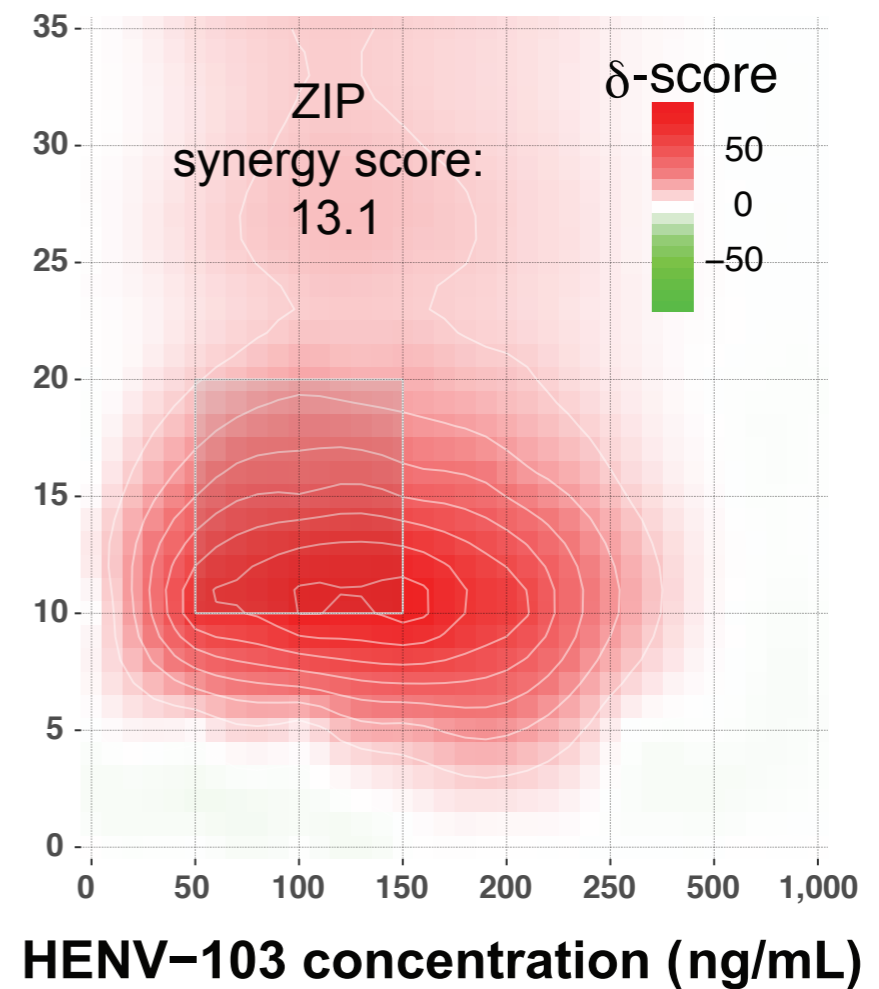

### A. NiV<sub>B</sub>-VSV Neutralization *in vitro*

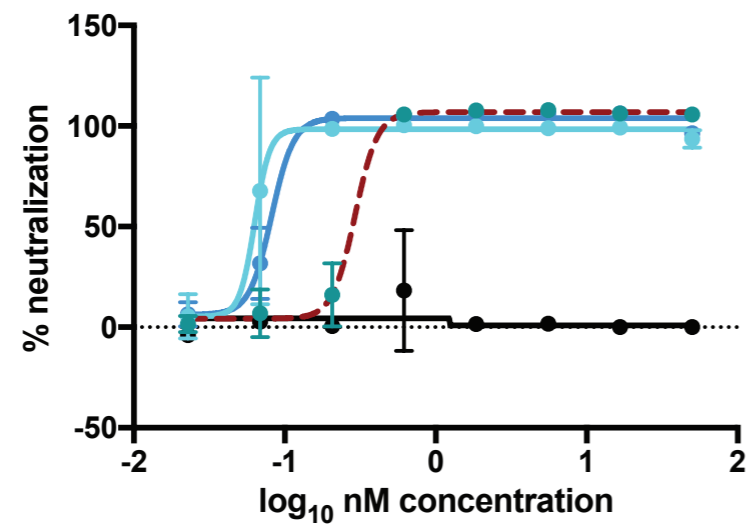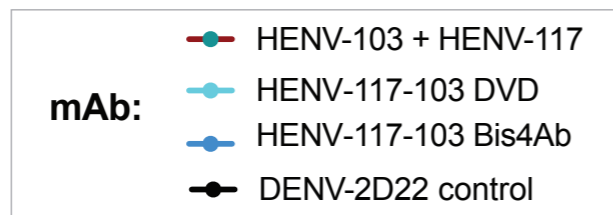

### B. Authentic NiV<sub>B</sub> challenge *in vivo*

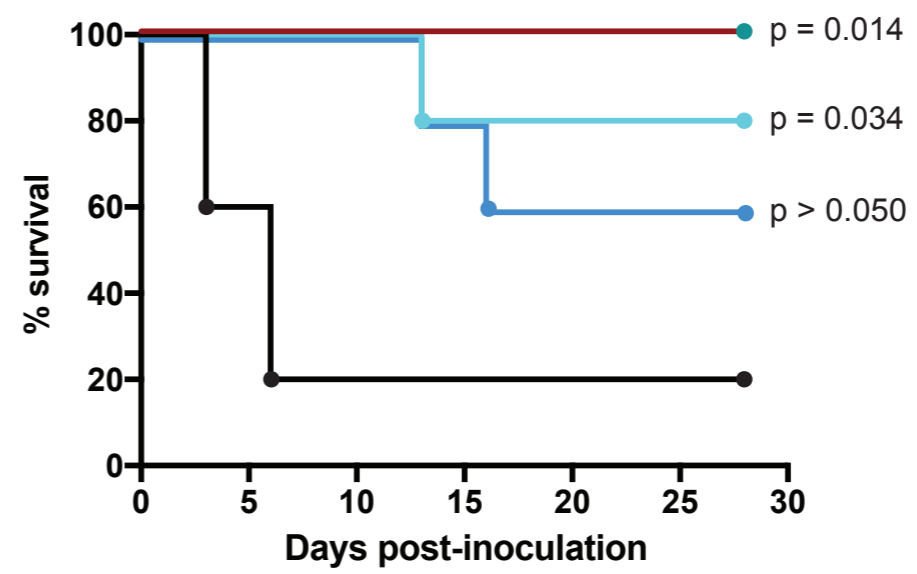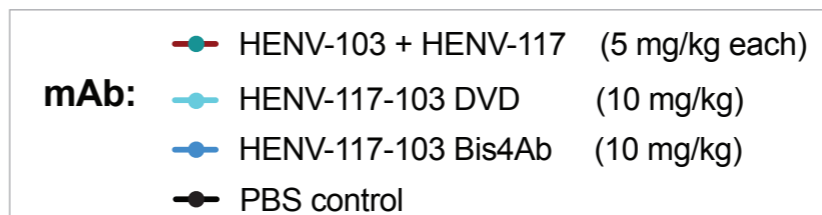

Source: https://biorxiv.org/content/10.1101/2021.02.17.431743v1.full.pdf
